# Supplementary material for: Computational Design, Synthesis, and Biophysical Evaluation of β-Amido Boronic Acids as SARS-CoV-2 Mpro Inhibitors
Source: MDPI journal article supplement (doi:10.3390/molecules28052356), 2023-03-03

# **Electronic supporting information *for***

## **Computational Design, Synthesis, and Biophysical Evaluation of $\beta$ -Amido Boronic Acids as SARS-CoV-2 M<sup>pro</sup> Inhibitors**

Enrico M. A. Fassi, Marco Manenti, Andrea Citarella, Michele dei Cas, Sara Casati, Nicola Micale, Tanja Schirmeister, Gabriella Roda, Alessandra Silvani, and Giovanni Grazioso

### **Table of contents:**

- Figure S1
- Figure S2
- Figure S3
- Figure S4
- Figure S5
- Figure S6
- Figure S7
- Copies of  $^1\text{H}$ ,  $^{13}\text{C}$  and  $^{11}\text{B}$  NMR spectra

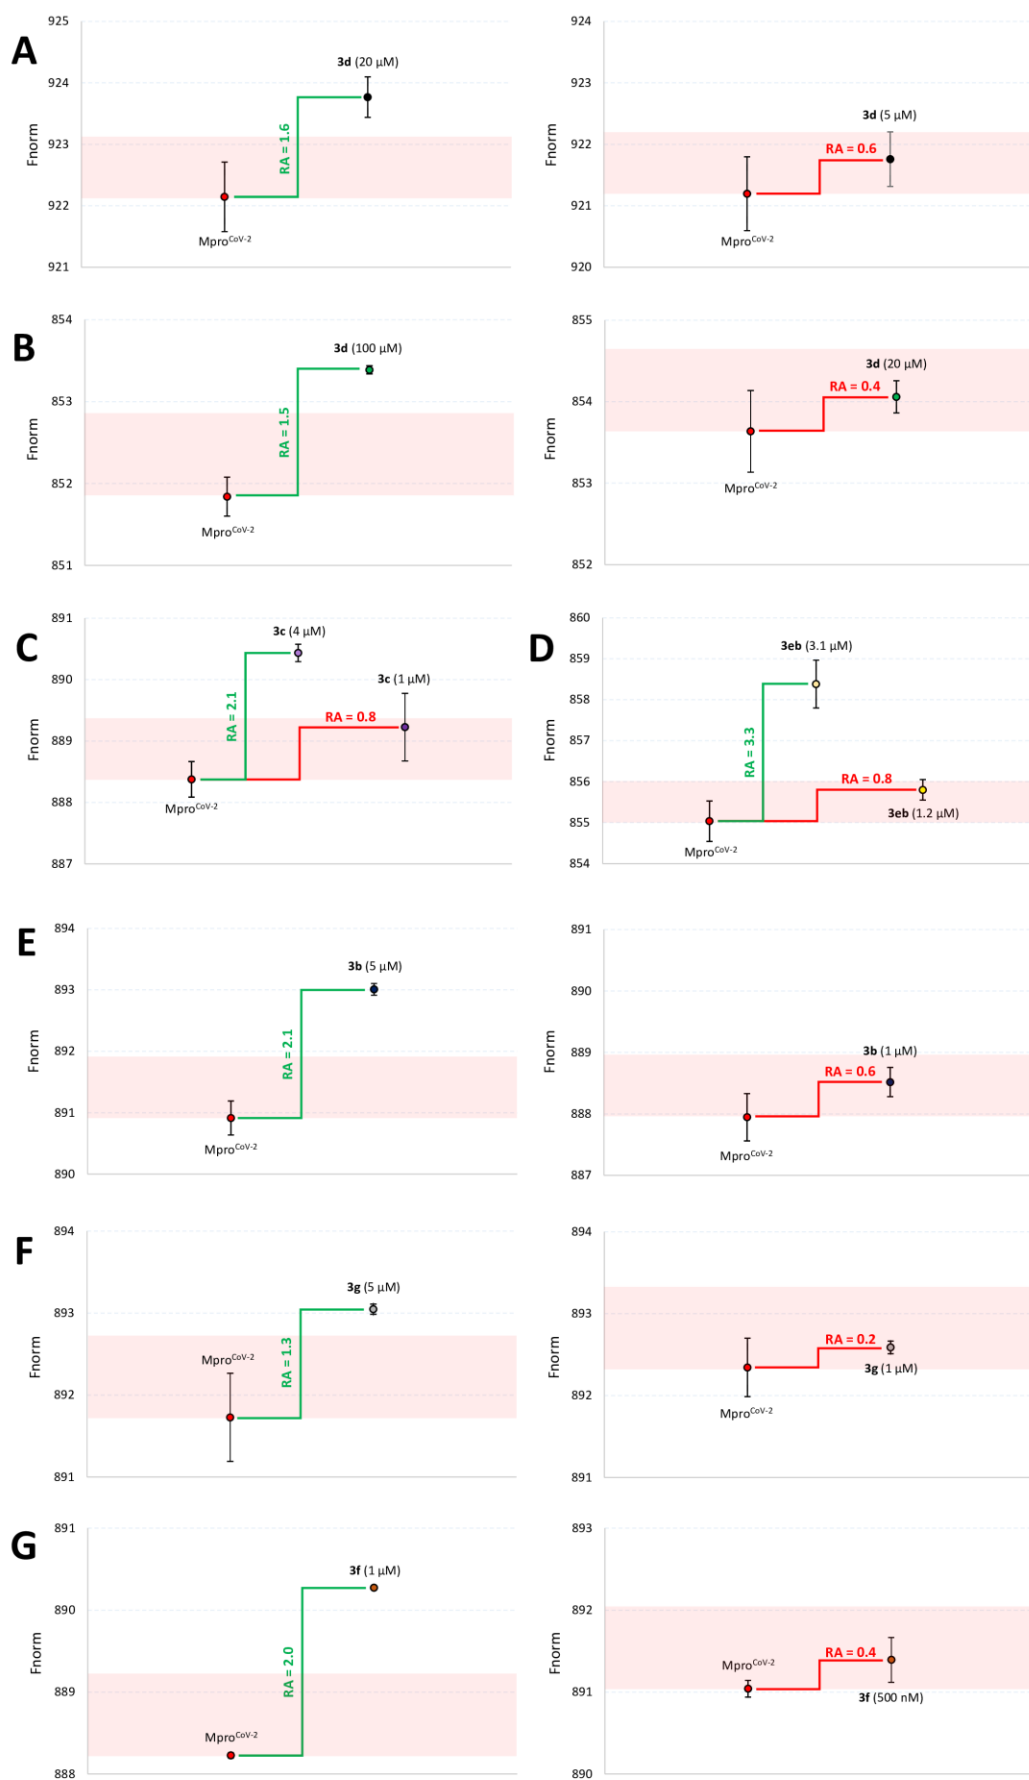

**Figure S1.** MST binding check experiments of  $\beta$ -amido boronic compounds reported in Table 2 on the manuscript. In red is highlighted the “no binding” Fnorm area due to an insufficient Response Amplitude (RA).

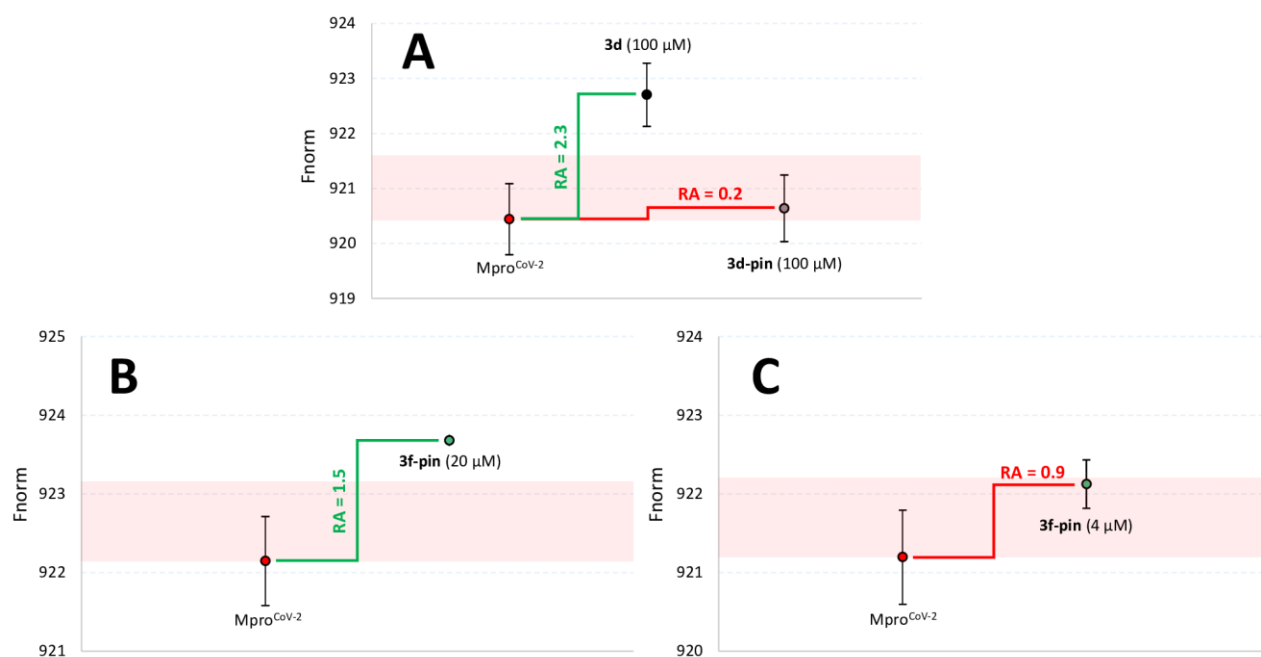

**Figure S2.** MST binding check experiment of  $\beta$ -amido boronic compounds protected by the pinacol group. (A) Comparison between **3d** and **3d-pin** at a concentration of 100  $\mu\text{M}$ . (B-C) **3f-pin** at a concentration of 20  $\mu\text{M}$  and 4  $\mu\text{M}$ , respectively. In red is highlighted the “no binding”  $F_{\text{norm}}$  area due to an insufficient Response Amplitude (RA).

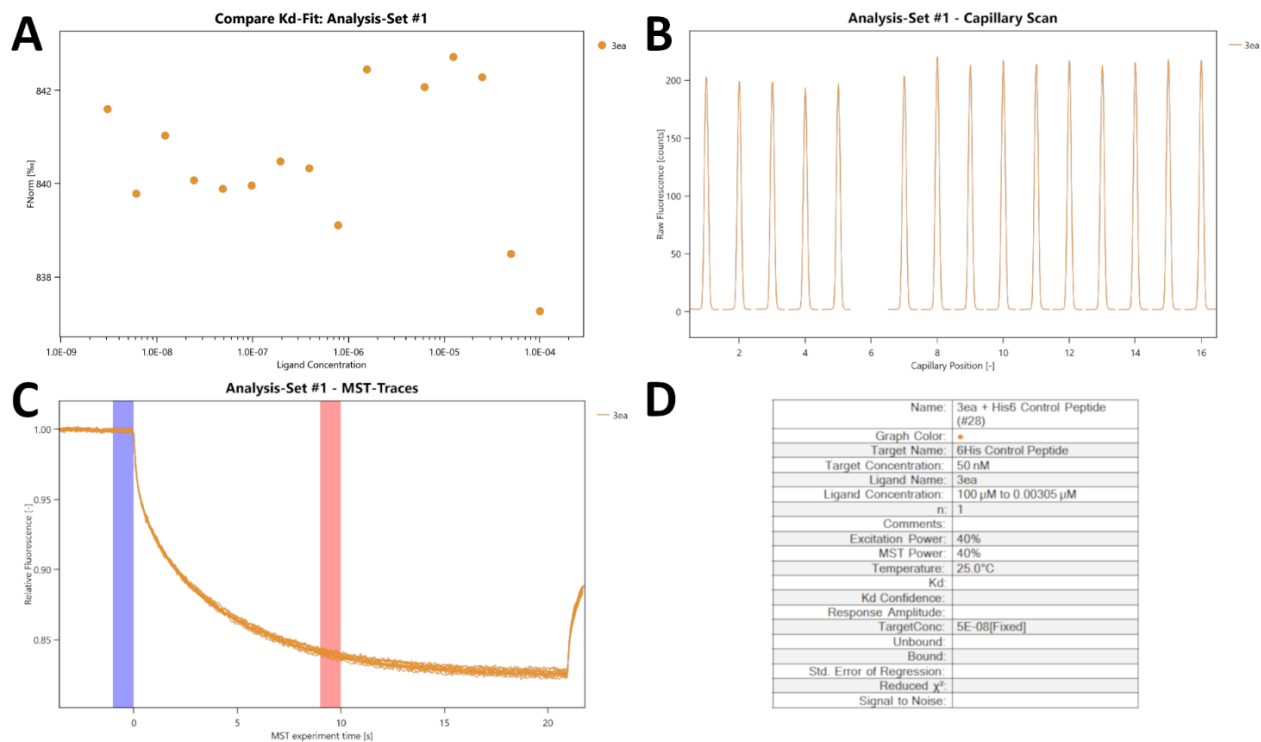

**Figure S3.** MST analysis reporting the binding affinity assay of **3ea** on 6His Control Peptide. (A)  $F_{\text{norm}}$  values, (B) raw fluorescence values and (C) MST traces observed for each capillary. (D) Dataset overview. The 6<sup>th</sup> point, corresponding to a concentration of 3.1  $\mu$ M, was discarded since it appears to be a clear outlier.

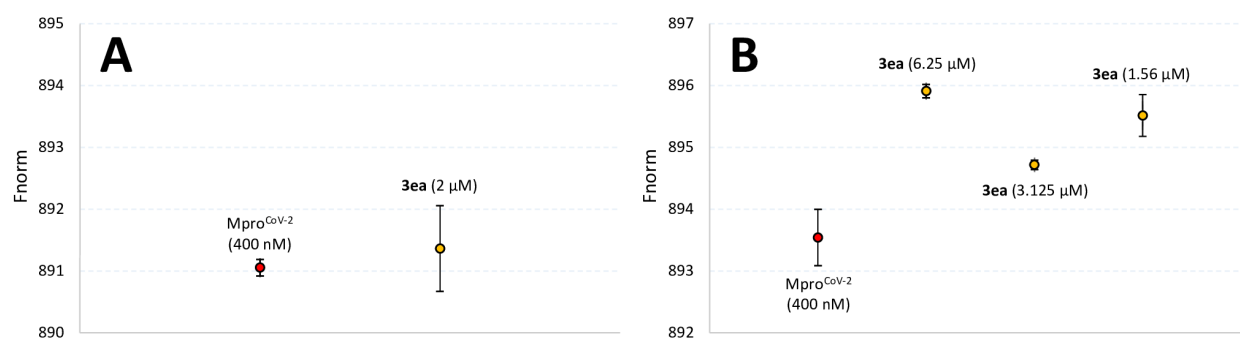

**Figure S4.** MST binding check experiments to determine whether if **3ea** compound binds reversibly or irreversibly to the Mpro<sup>Cov-2</sup>. (A) Fnorm values of protein alone compared to **3ea**(2 μM)/Mpro<sup>Cov-2</sup> complex. (B) Fnorm values of protein alone compared to **3ea**(6.25 μM)/protein complex and its dilutions.

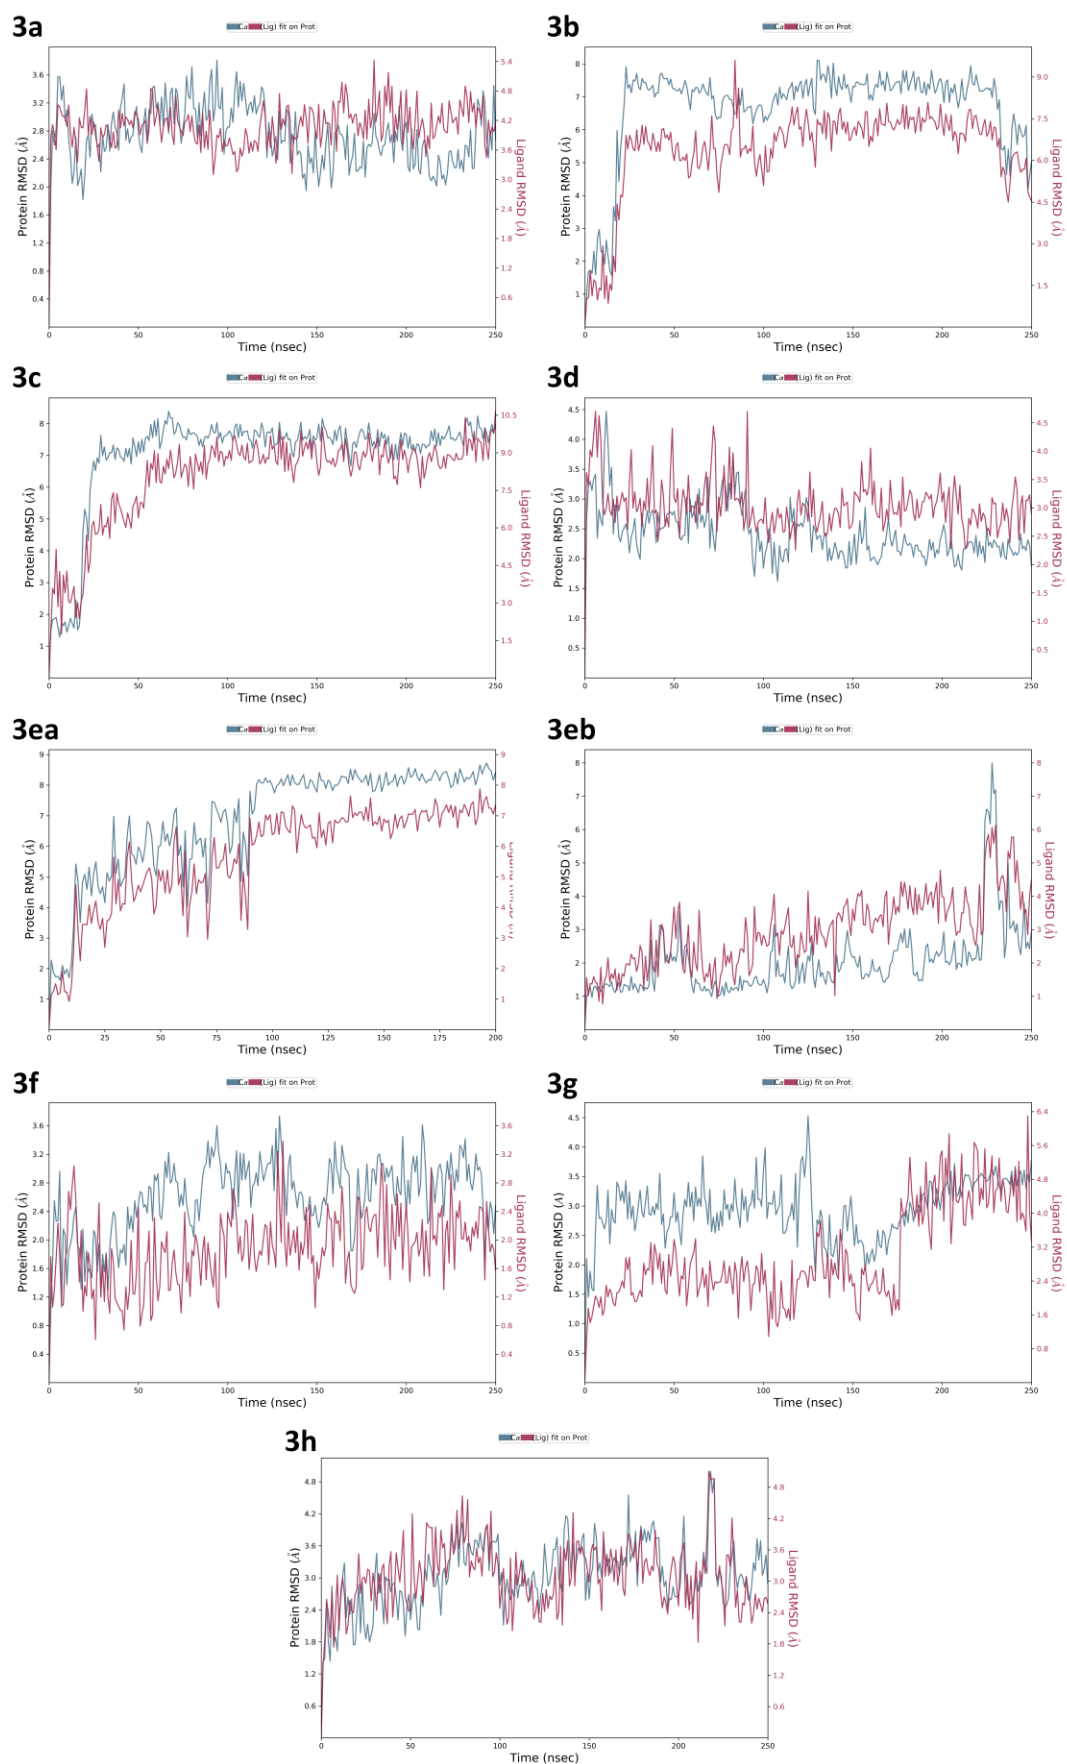

**Figure S5.** RMSD versus time plots of the synthesized  $\beta$ -amido boronic compounds reported in Table 1 in the main text. All the compounds were subjected to a 250 ns-long MD simulations.

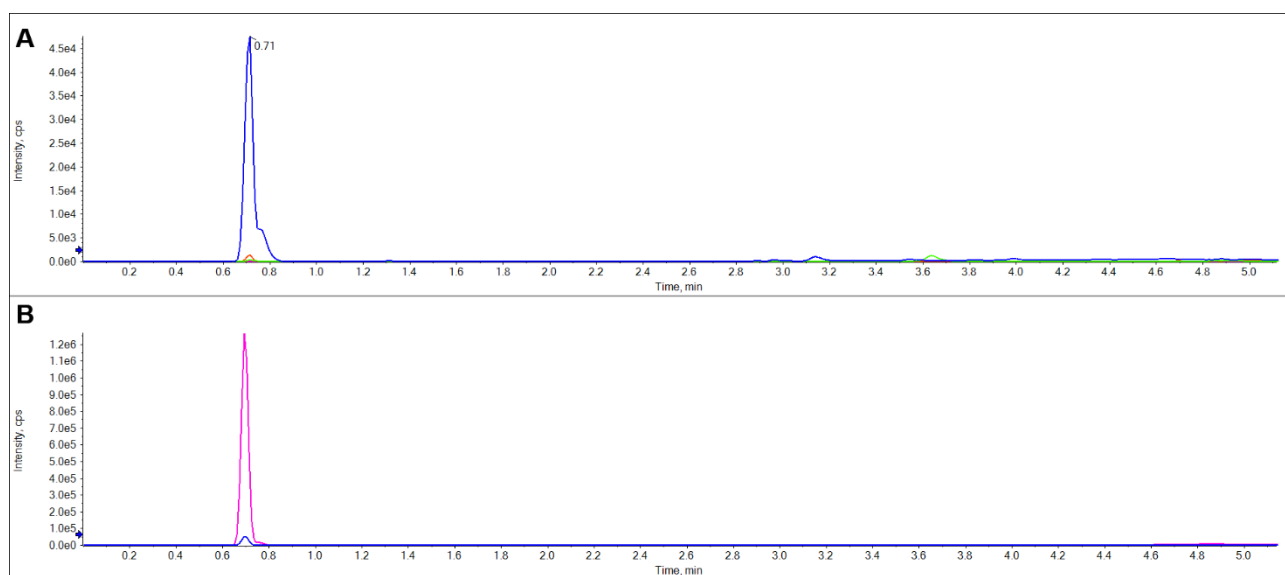

**Figure S6.** LC-MS/MS experiment on a  $\beta$ -amido boronic acid. (A) Extracted ion chromatograms of **3ea**  $[M+H]^+$  and (B) **3ea**  $[M+2H]^{2+}$ .

A

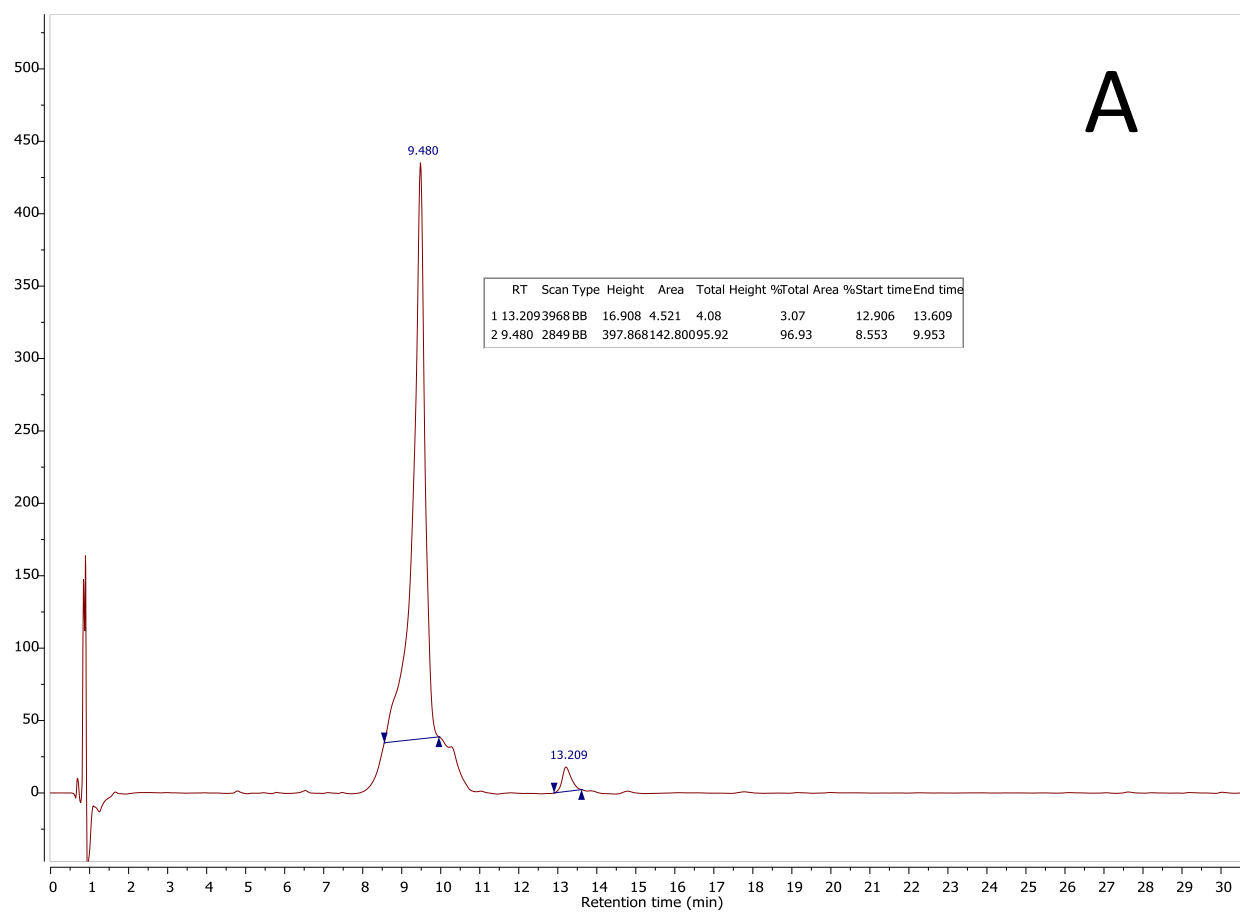



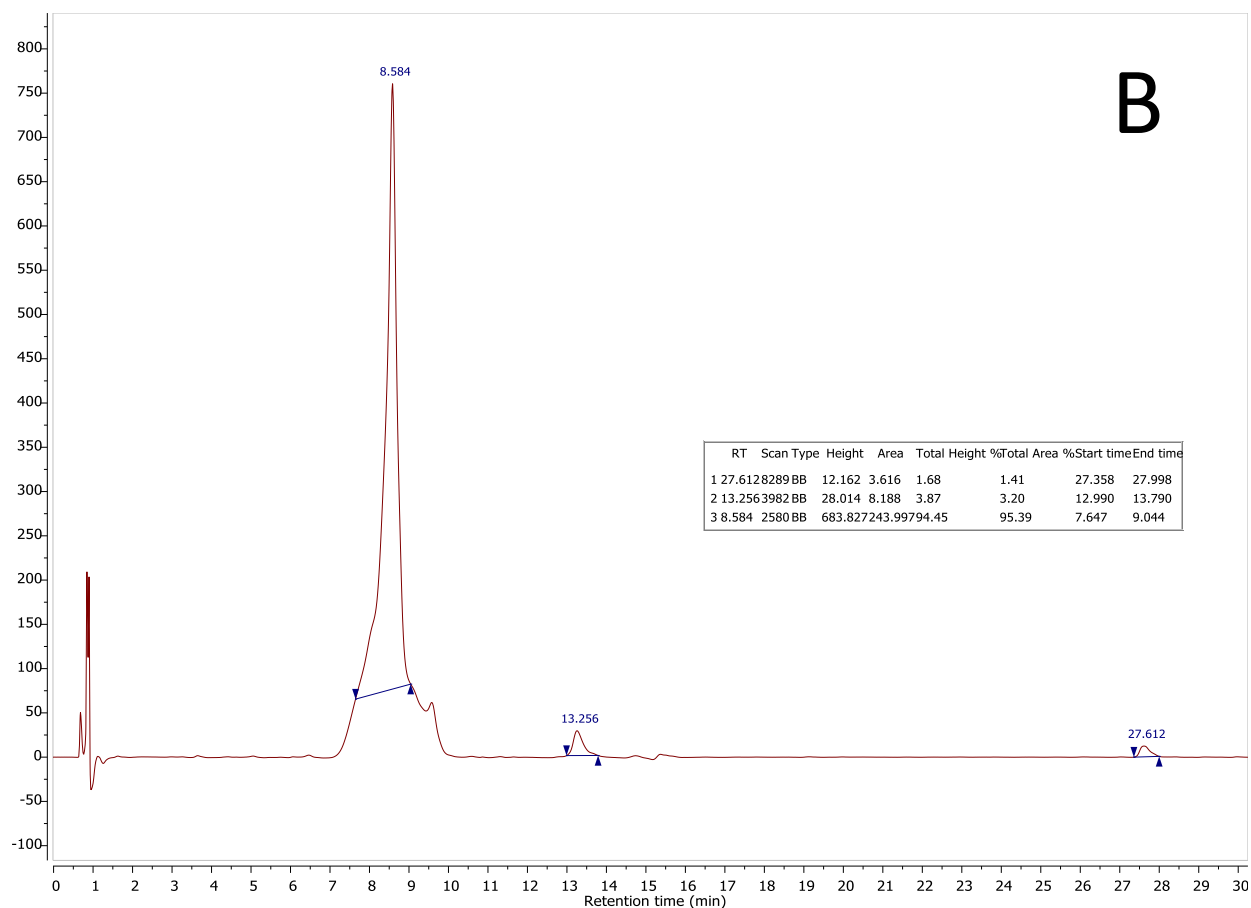

**Figure S7. HPLC chromatograms for compounds 3a (panel A) and 3ea (panel B).** HPLC was performed on Agilent 1100 Series System using a Gemini 5  $\mu$ M C18 110 Å LC Column 150  $\times$  3 mm and a gradient of H<sub>2</sub>O/ACN from 5% ACN to 100% ACN in 30 min, flux of 1.0 mL/min and sample injection of 20  $\mu$ L. The wavelength used for detection was 220 nm.

$^1\text{H}$  NMR of compound **2a** (400 MHz,  $\text{CDCl}_3$  55:45 rotameric mixture)

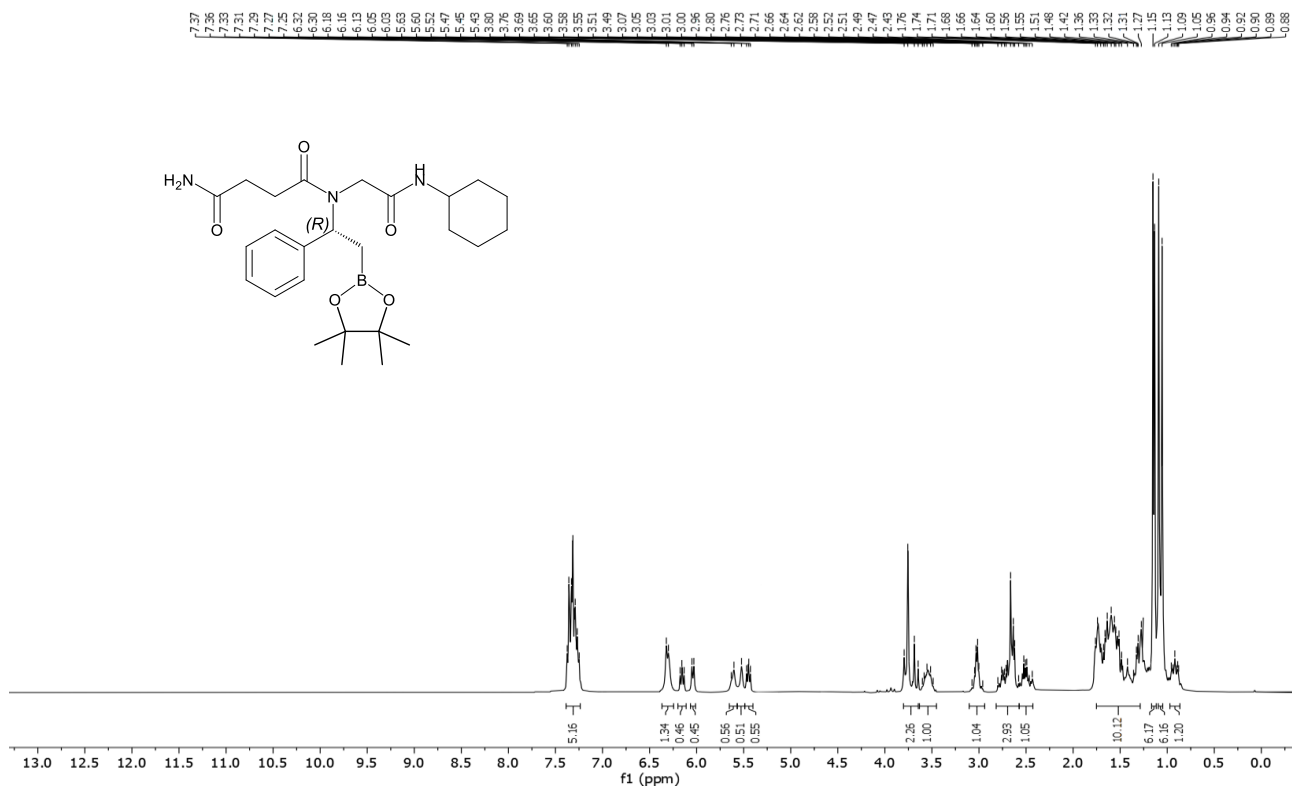

$^{13}\text{C}$  NMR of compound **2a** (101 MHz,  $\text{CDCl}_3$  55:45 rotameric mixture)

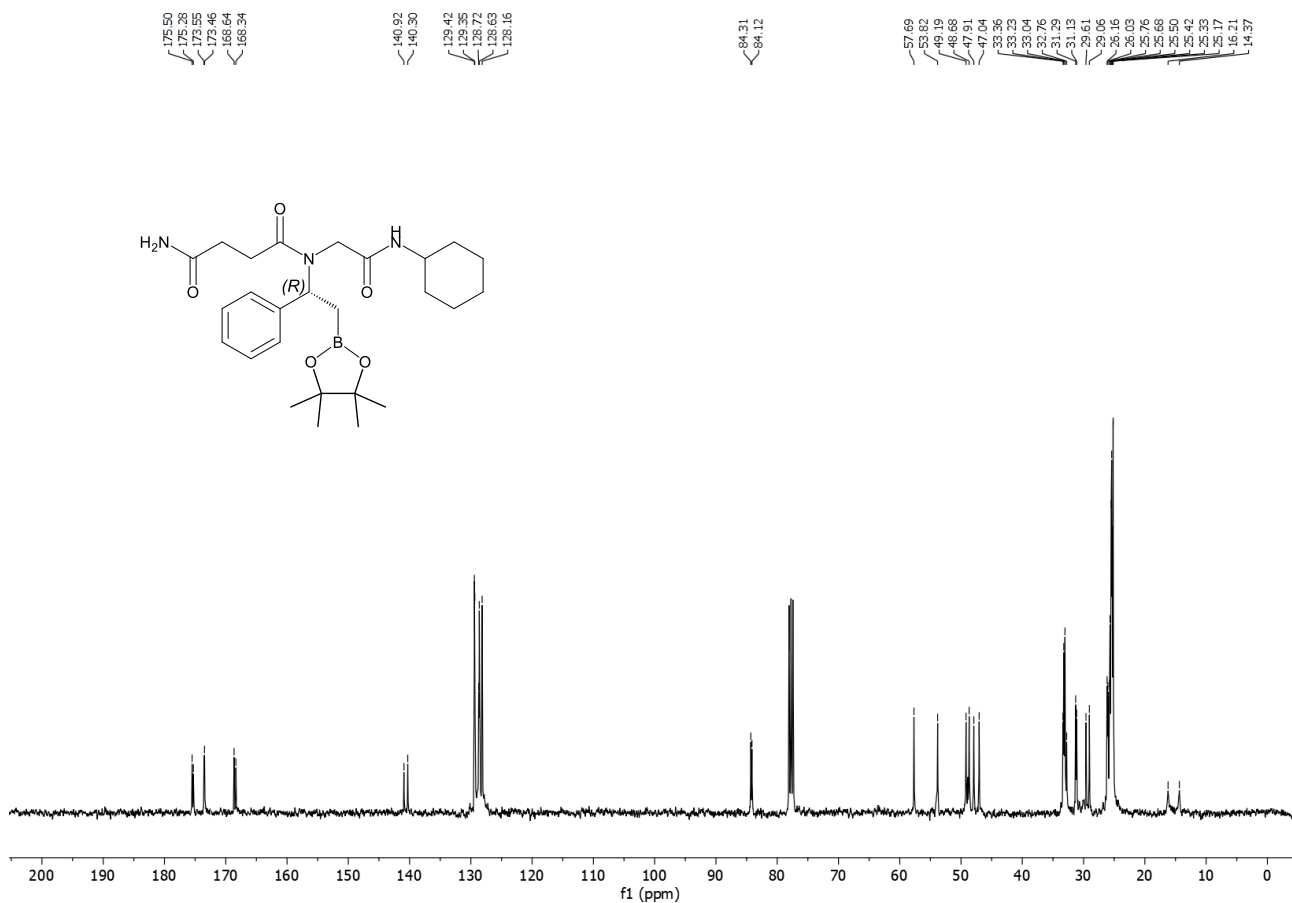

$^{11}\text{B}$  NMR of compound **2a** (128 MHz,  $\text{CDCl}_3$ )

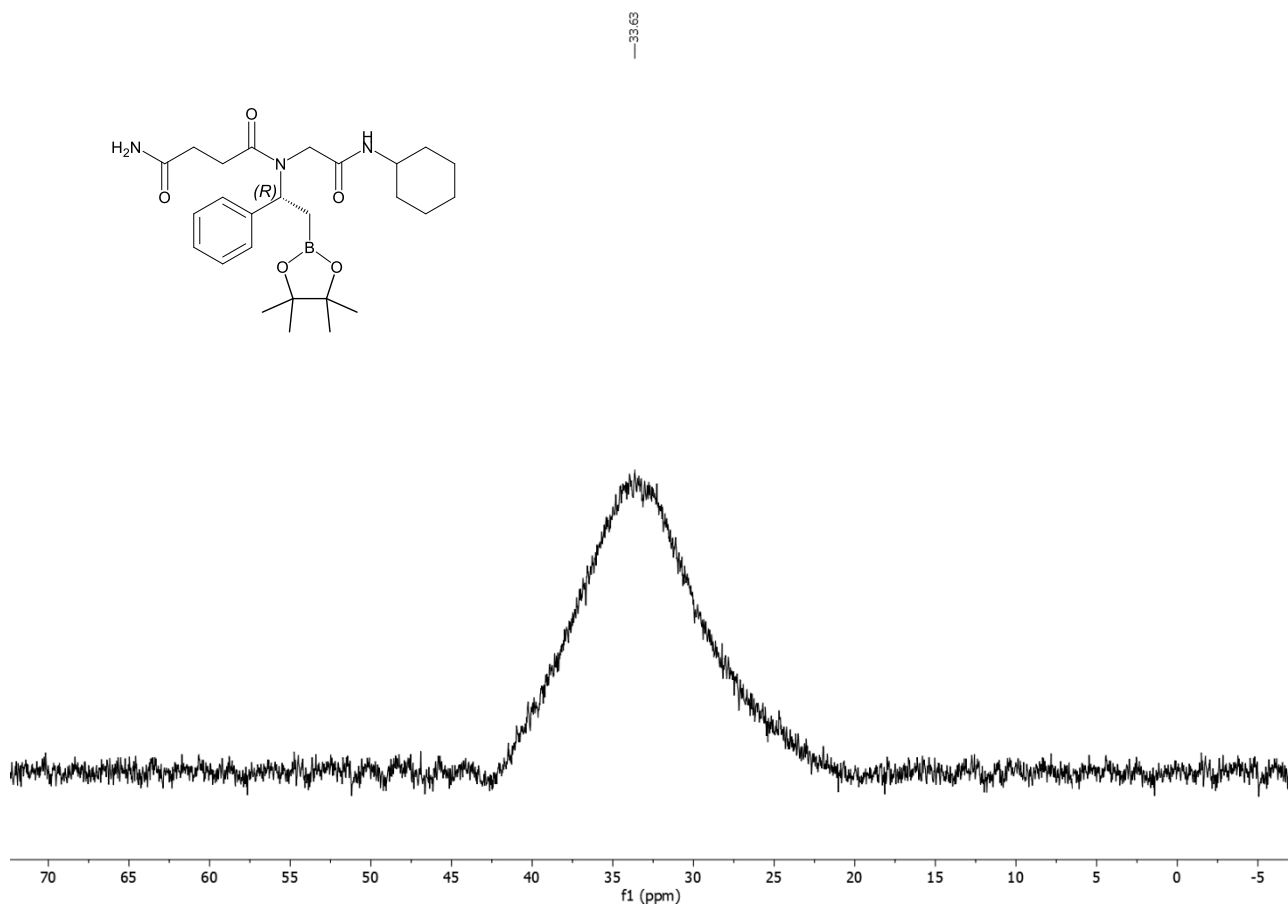

$^1\text{H}$  NMR of compound **2b** (400 MHz,  $\text{CDCl}_3$ , 50:50 rotameric mixture)

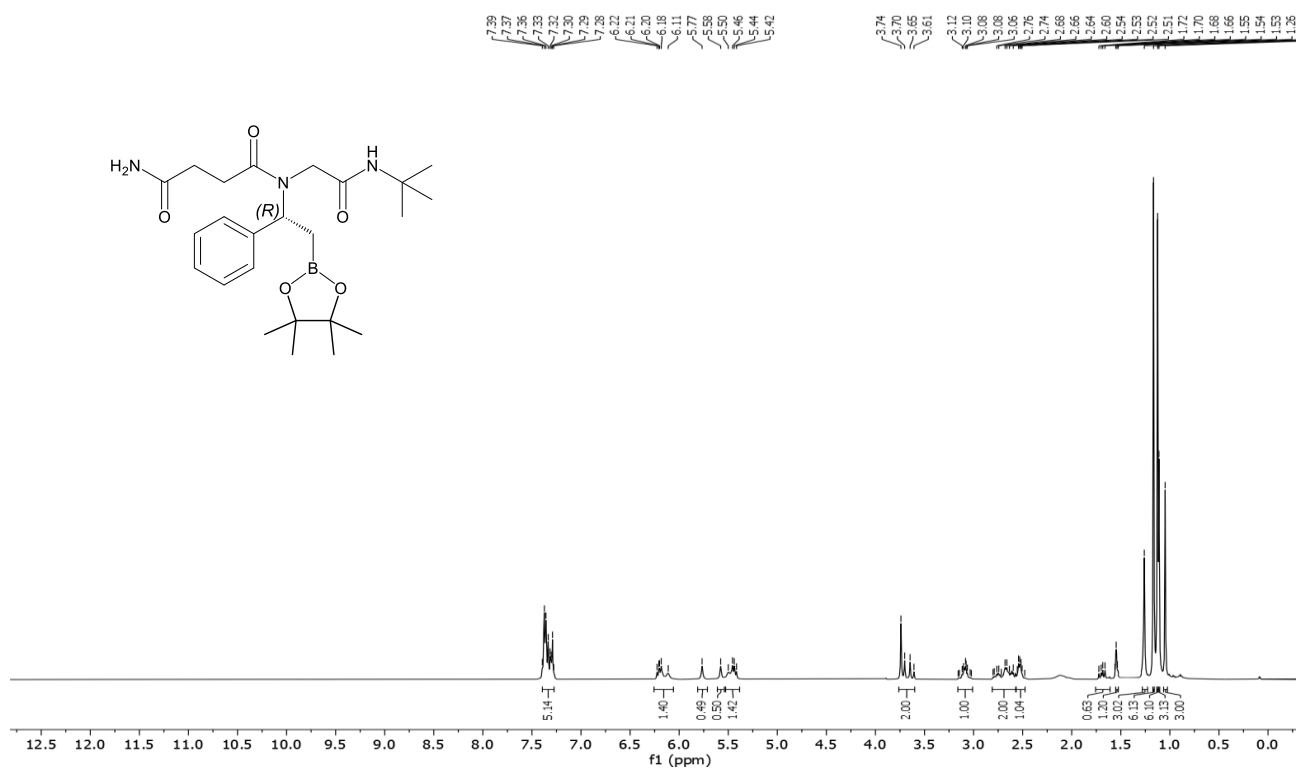

$^{13}\text{C}$  NMR of compound **2b** (101 MHz,  $\text{CDCl}_3$  50:50 rotameric mixture)

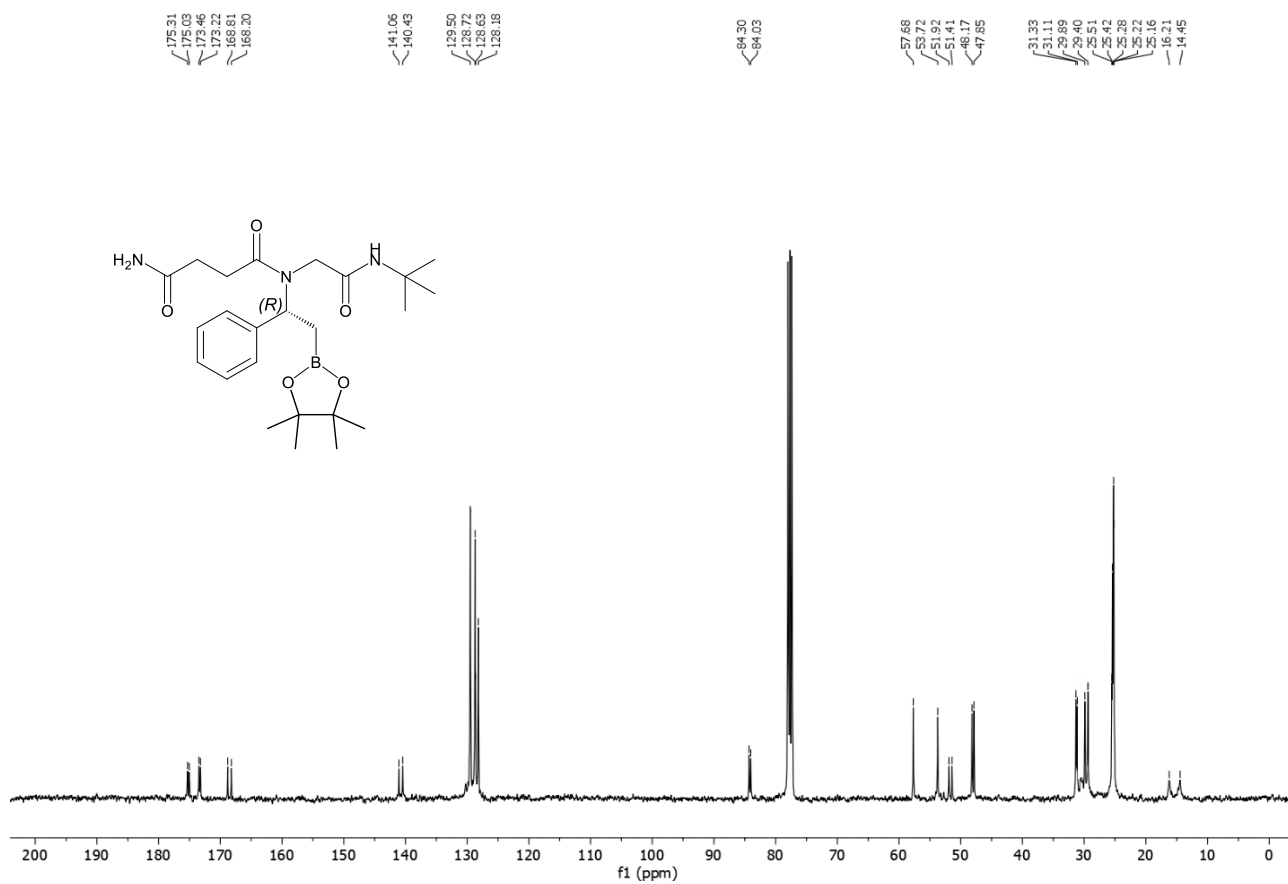

$^{11}\text{B}$  NMR of compound **2b** (128 MHz,  $\text{CDCl}_3$ )

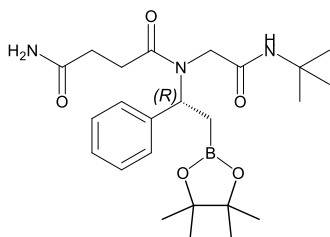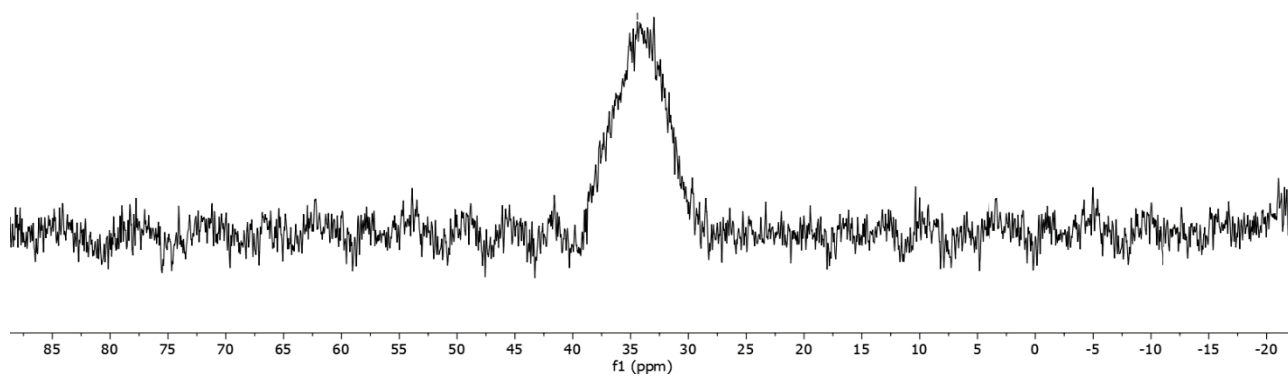

$^1\text{H}$  NMR of compound **2c** (400 MHz,  $\text{CDCl}_3$  65:35 rotameric mixture)

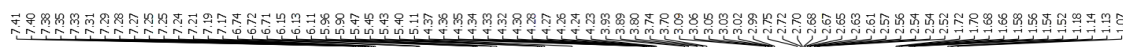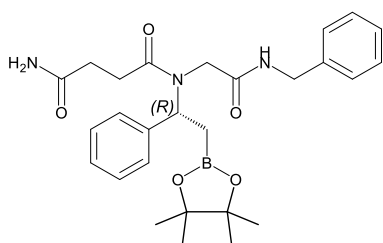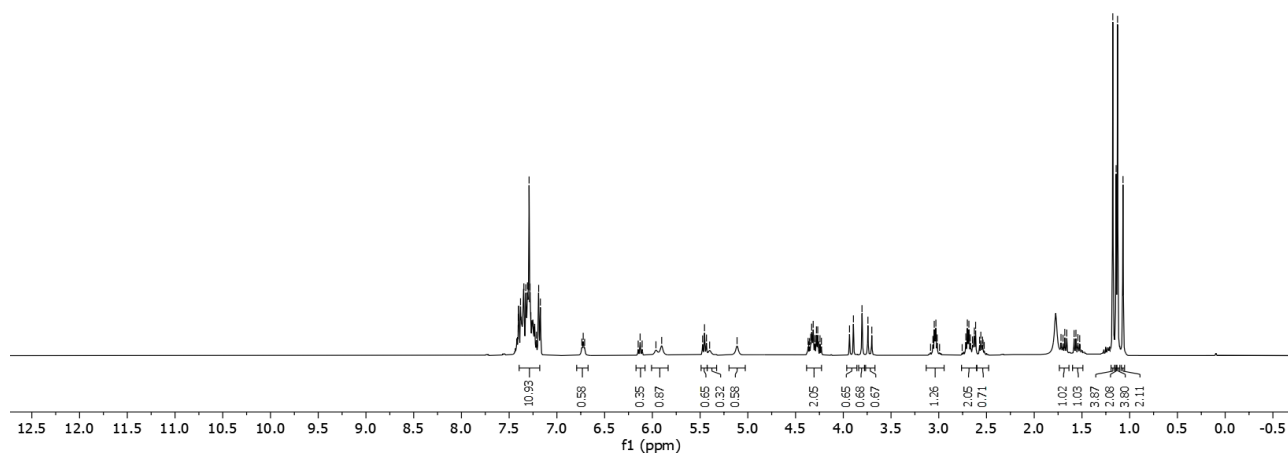

$^{13}\text{C}$  NMR of compound **2c** (101 MHz,  $\text{CDCl}_3$  65:35 rotameric mixture)

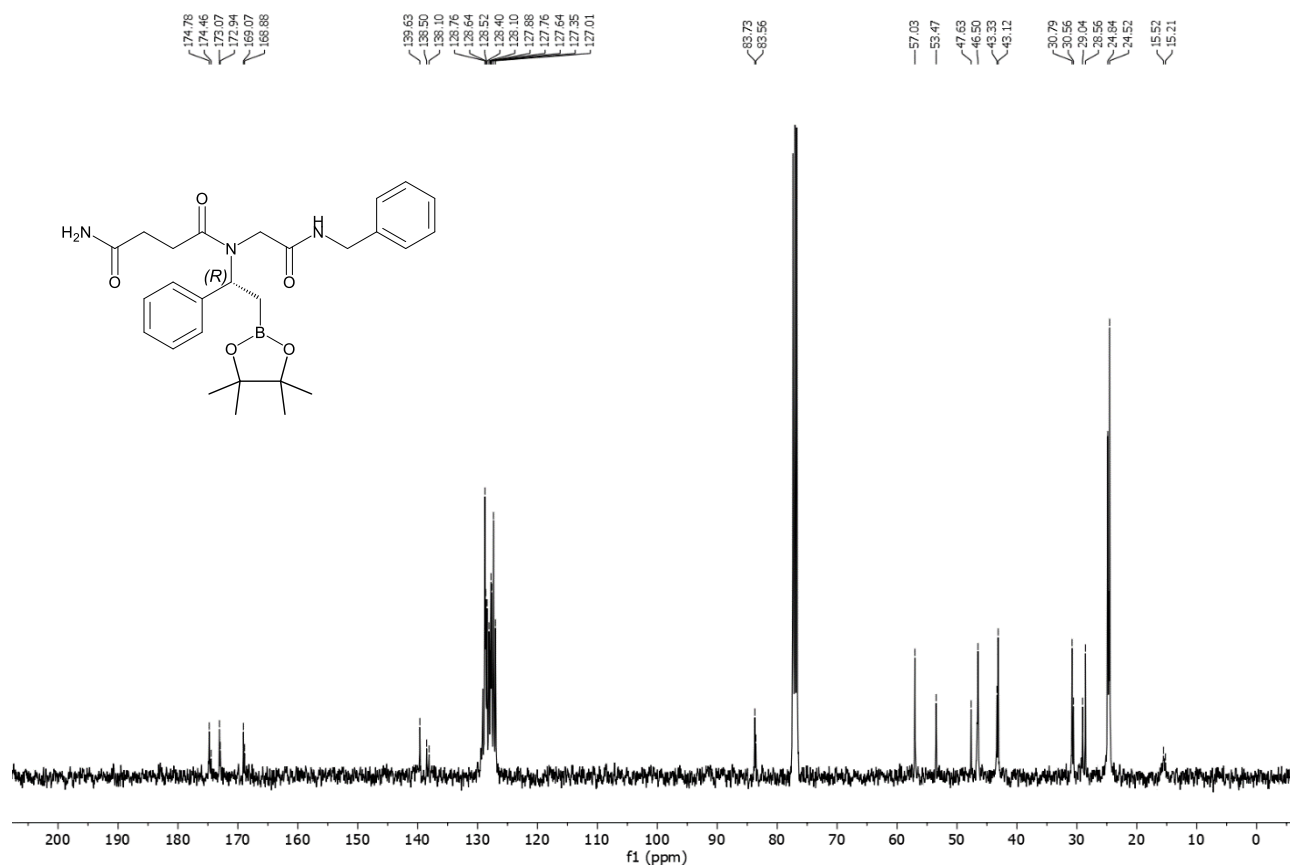

$^{11}\text{B}$  NMR of compound **2c** (128 MHz,  $\text{CDCl}_3$ )

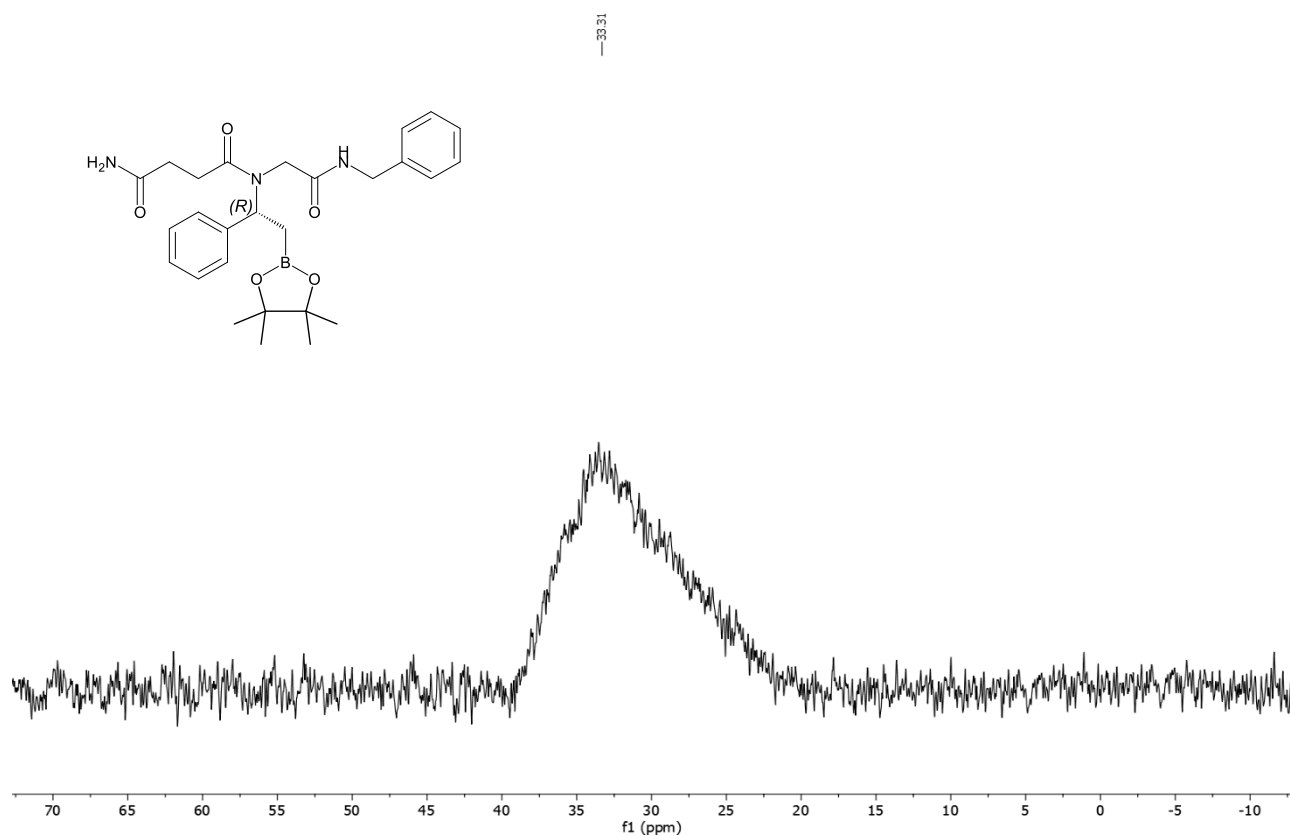

$^1\text{H}$  NMR of compound **2d** (400 MHz,  $\text{CDCl}_3$ , complex rotameric mixture: the section by section integration proves the overall number of protons)

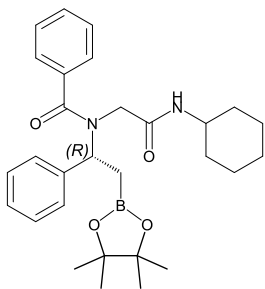[illegible]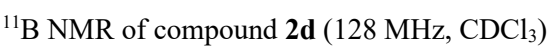

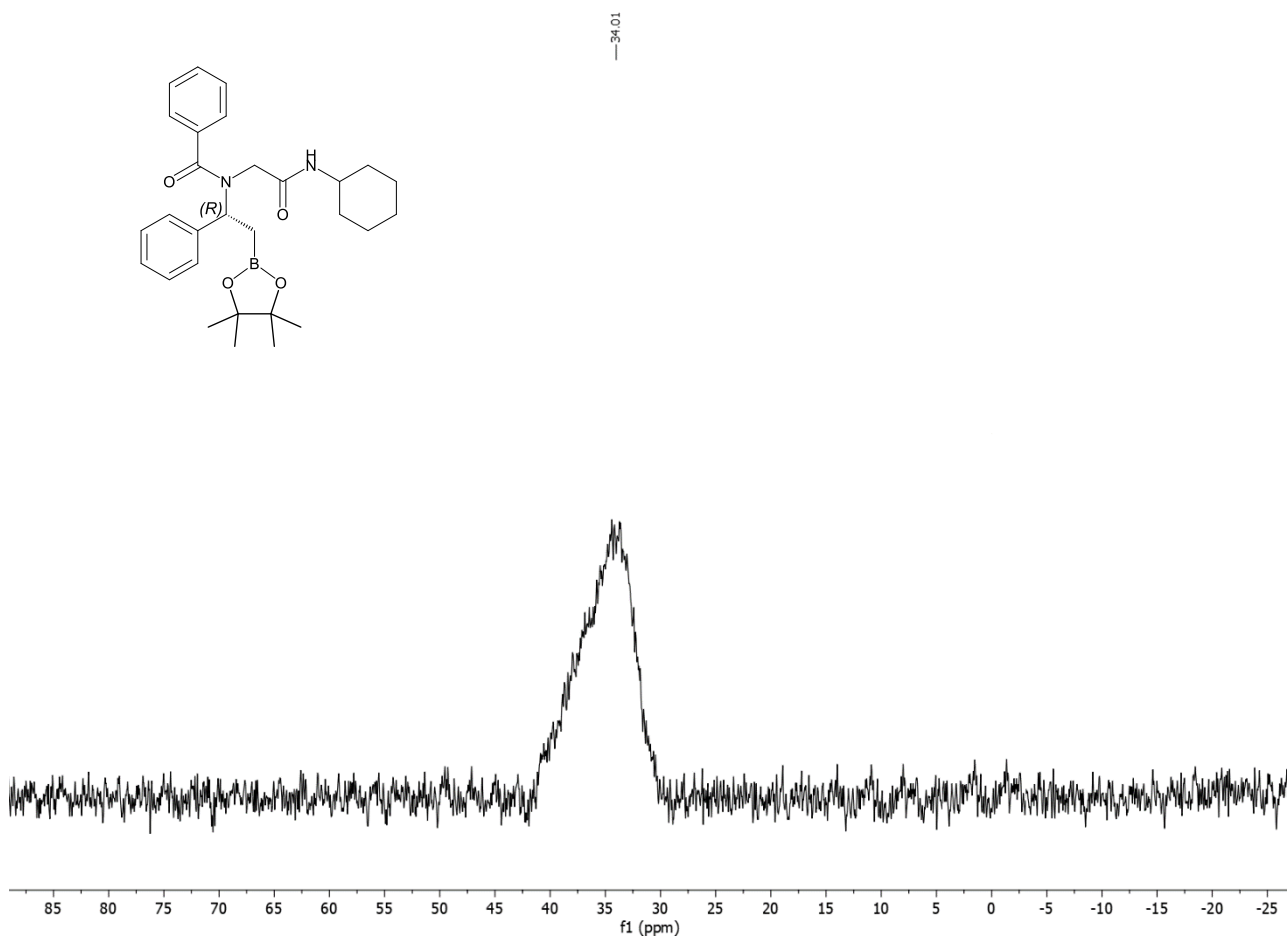

<sup>1</sup>H NMR of compound **2ea** (400 MHz, CDCl<sub>3</sub> 60:40 rotameric mixture)

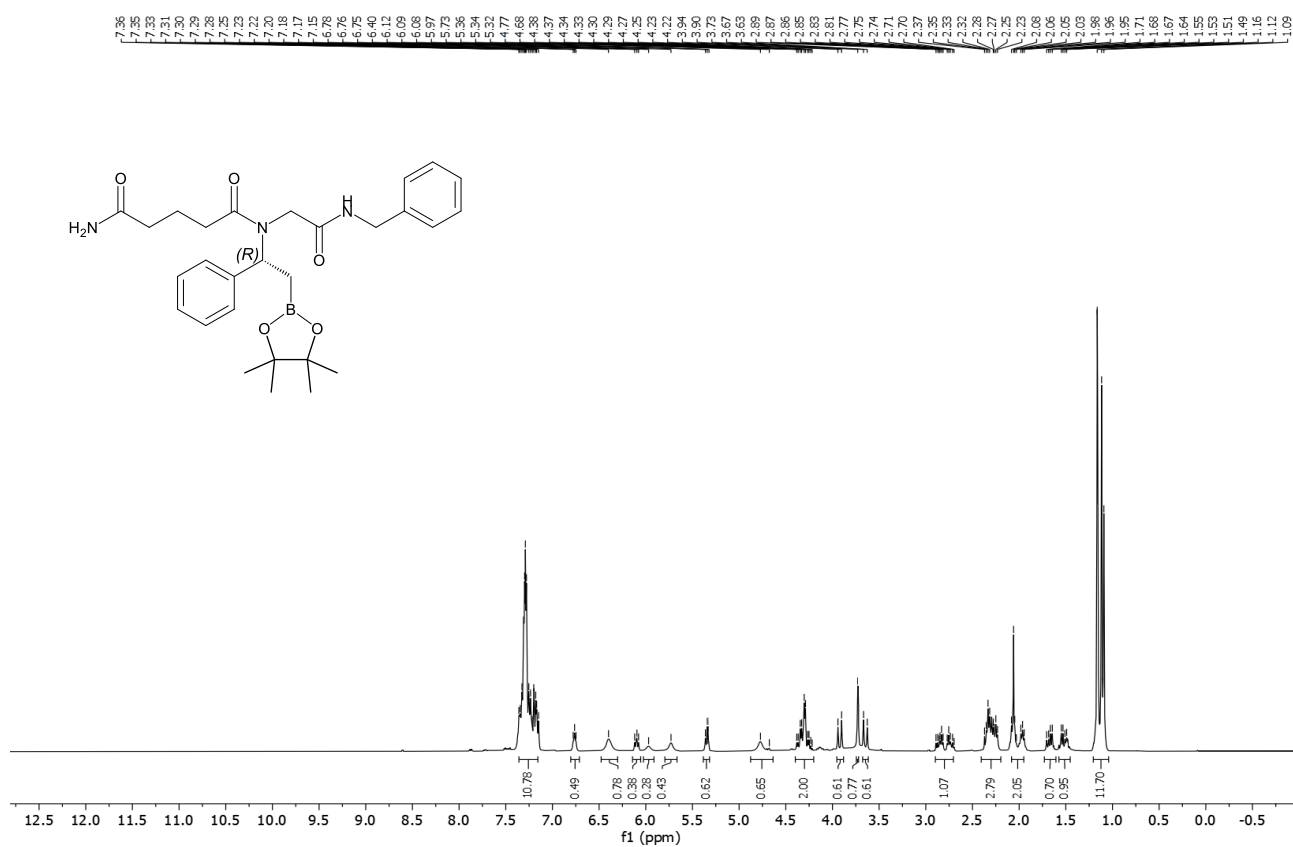



$^{13}\text{C}$  NMR of compound **2ea** (101 MHz,  $\text{CDCl}_3$ , 60:40 rotameric mixture)

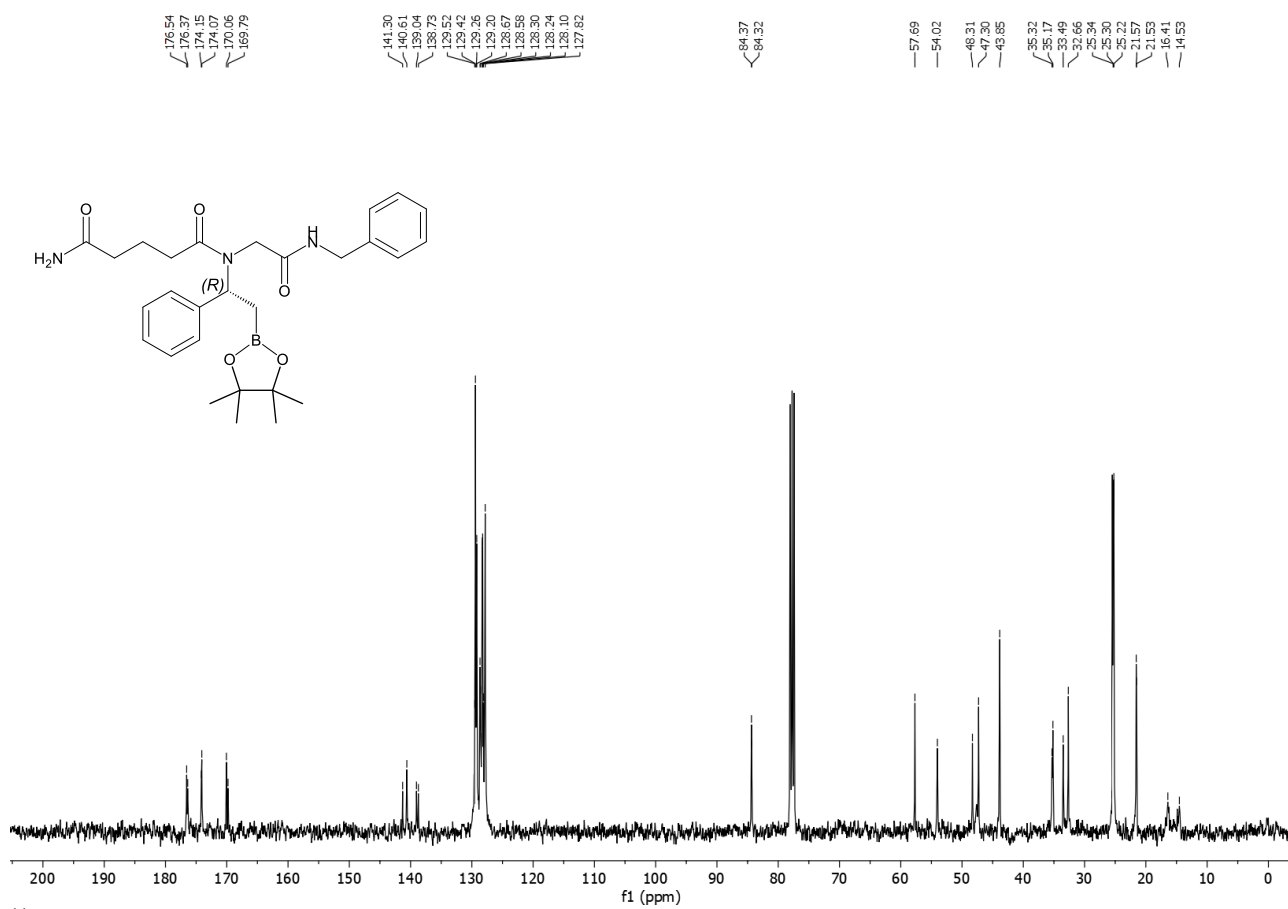

$^{11}\text{B}$  NMR of compound **2ea** (128 MHz,  $\text{CDCl}_3$ )

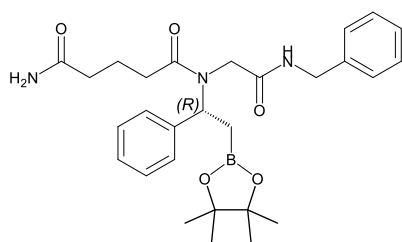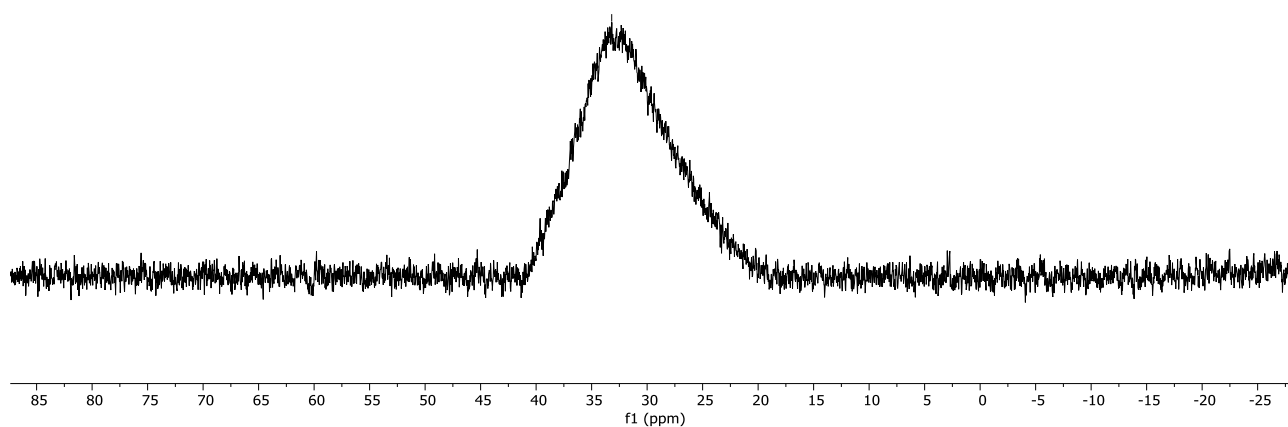

$^1\text{H}$  NMR of compound **2f** (400 MHz,  $\text{CDCl}_3$ , 55:45 rotameric mixture)

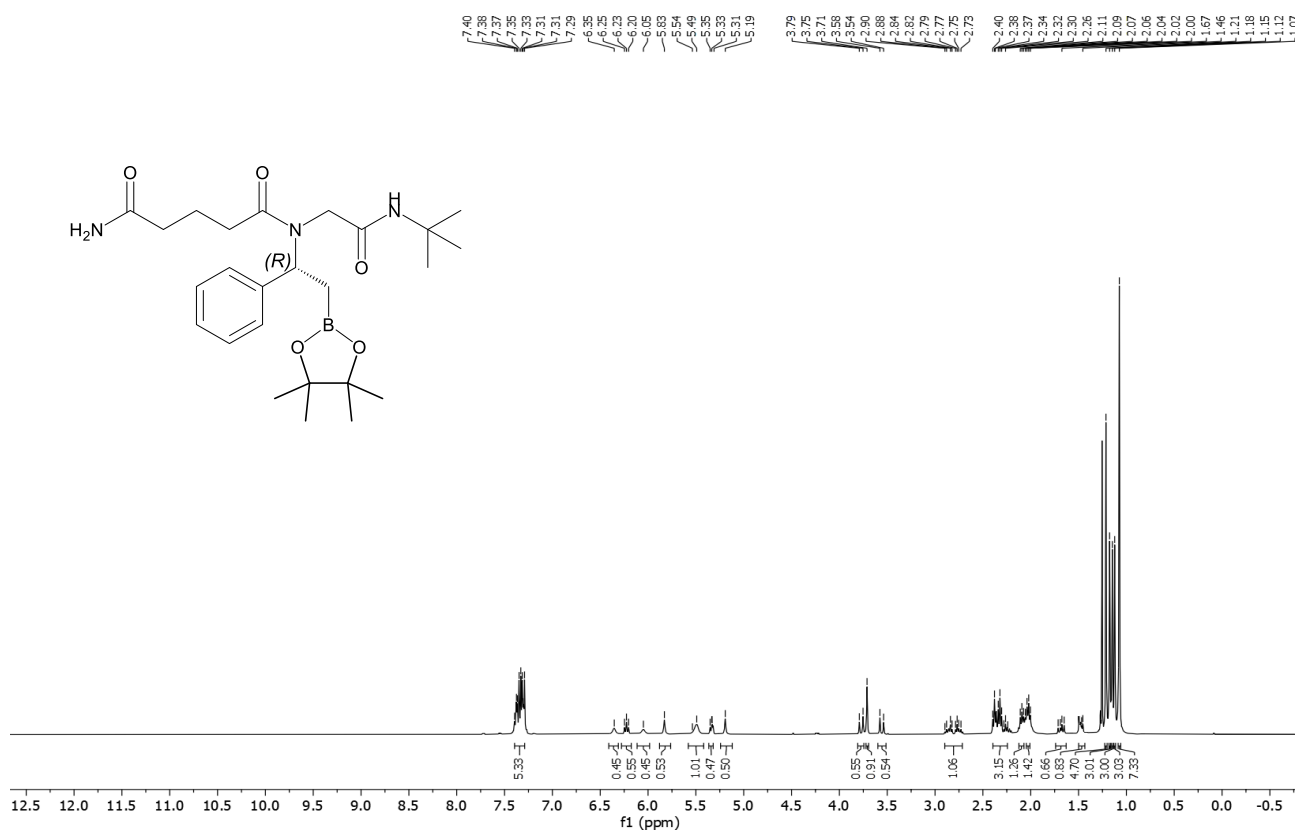

$^{13}\text{C}$  NMR of compound **2f** (101 MHz,  $\text{CDCl}_3$ , 55:45 rotameric mixture)

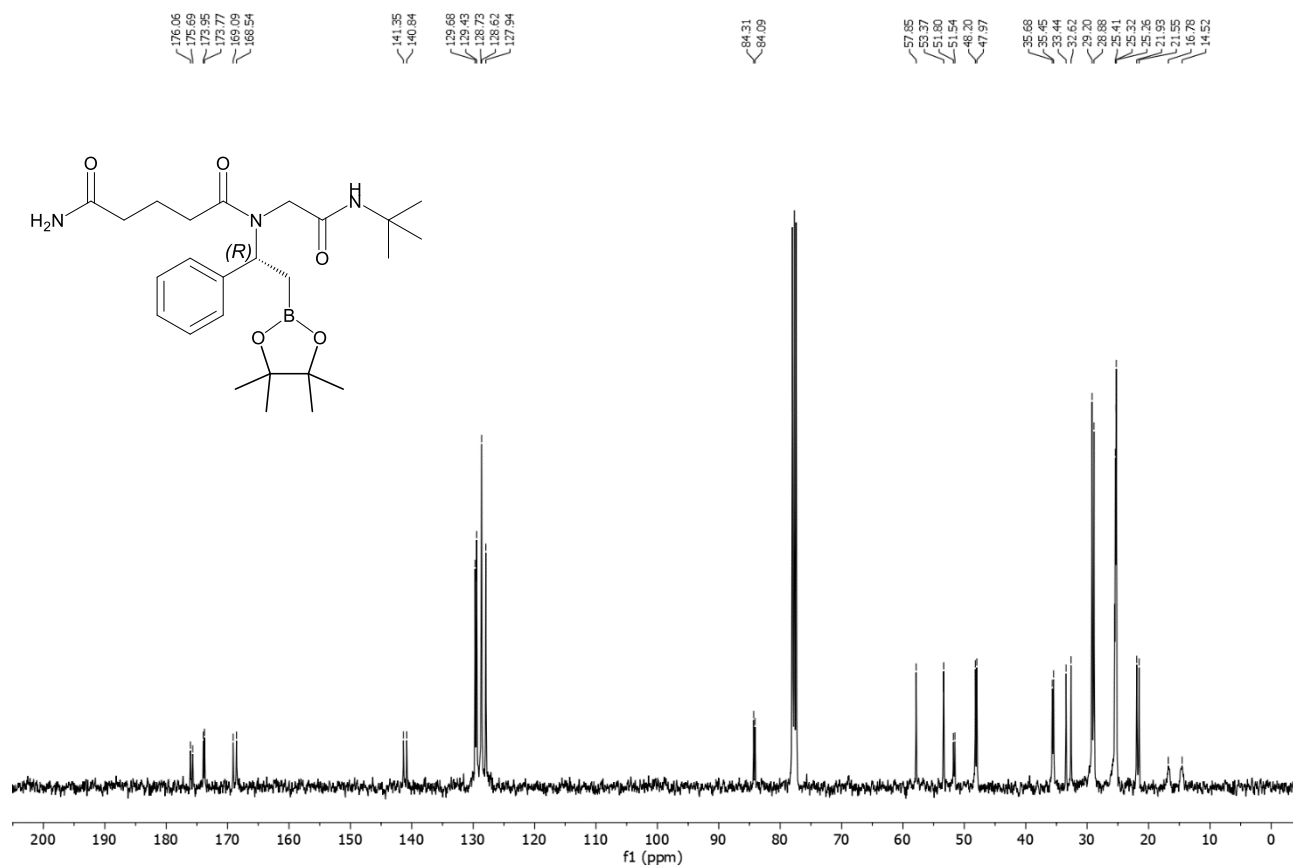

<sup>11</sup>B NMR of compound **2f** (128 MHz, CDCl<sub>3</sub>)

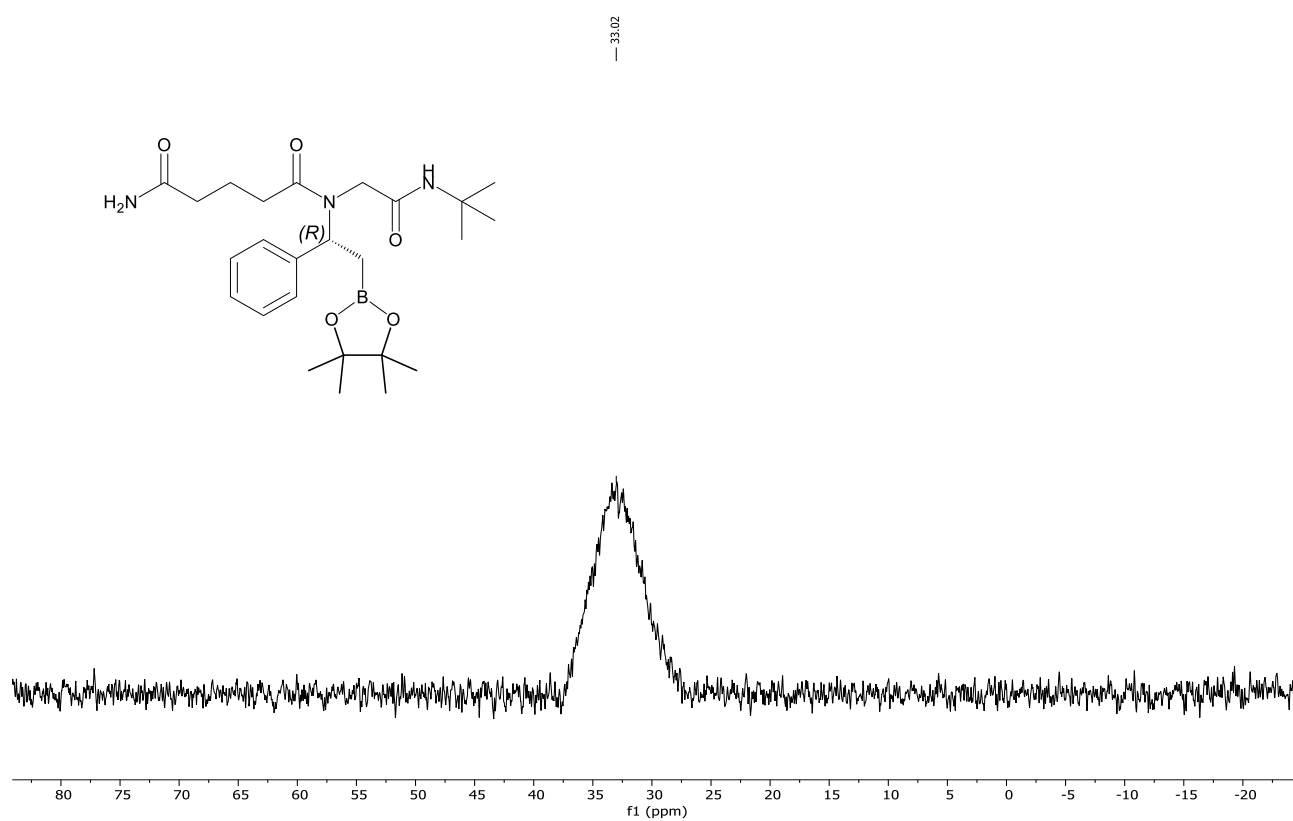

<sup>1</sup>H NMR of compound **2g** (400 MHz, CDCl<sub>3</sub> 65:35 rotameric mixture)

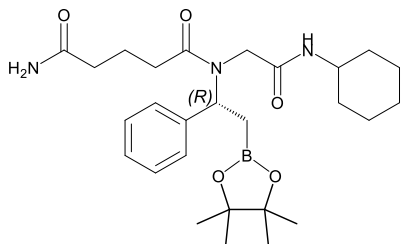

|        |        |        |        |        |        |        |        |        |        |        |        |        |        |       |       |       |       |       |       |       |       |       |       |       |       |       |       |       |       |       |       |       |       |       |       |       |       |       |       |       |
|--------|--------|--------|--------|--------|--------|--------|--------|--------|--------|--------|--------|--------|--------|-------|-------|-------|-------|-------|-------|-------|-------|-------|-------|-------|-------|-------|-------|-------|-------|-------|-------|-------|-------|-------|-------|-------|-------|-------|-------|-------|
| 175.25 | 174.85 | 173.22 | 166.33 | 167.90 | 140.74 | 140.14 | 128.91 | 128.73 | 128.01 | 127.96 | 127.80 | 127.60 | 127.25 | 83.65 | 83.59 | 57.19 | 52.81 | 48.24 | 47.98 | 47.39 | 46.76 | 35.06 | 35.06 | 32.60 | 32.72 | 32.68 | 32.51 | 32.13 | 31.96 | 25.52 | 25.36 | 24.90 | 24.83 | 24.68 | 24.58 | 24.30 | 21.30 | 20.91 | 15.94 | 13.72 |
|--------|--------|--------|--------|--------|--------|--------|--------|--------|--------|--------|--------|--------|--------|-------|-------|-------|-------|-------|-------|-------|-------|-------|-------|-------|-------|-------|-------|-------|-------|-------|-------|-------|-------|-------|-------|-------|-------|-------|-------|-------|

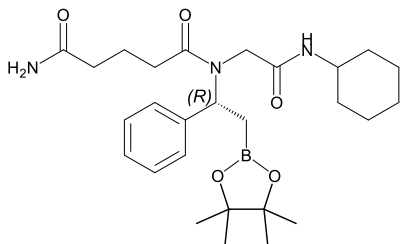<sup>11</sup>B NMR of compound **2g** (128 MHz, CDCl<sub>3</sub>)

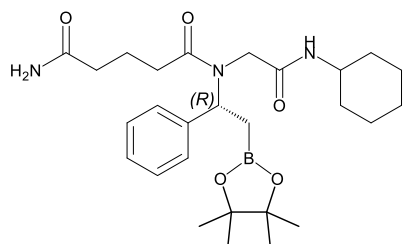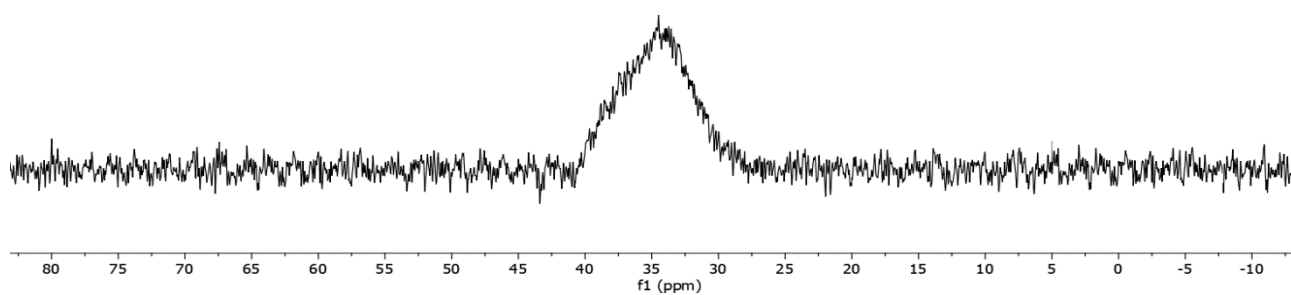

$^1\text{H}$  NMR of compound **2h** (400 MHz,  $\text{CDCl}_3$ , 50:50 rotameric mixture)

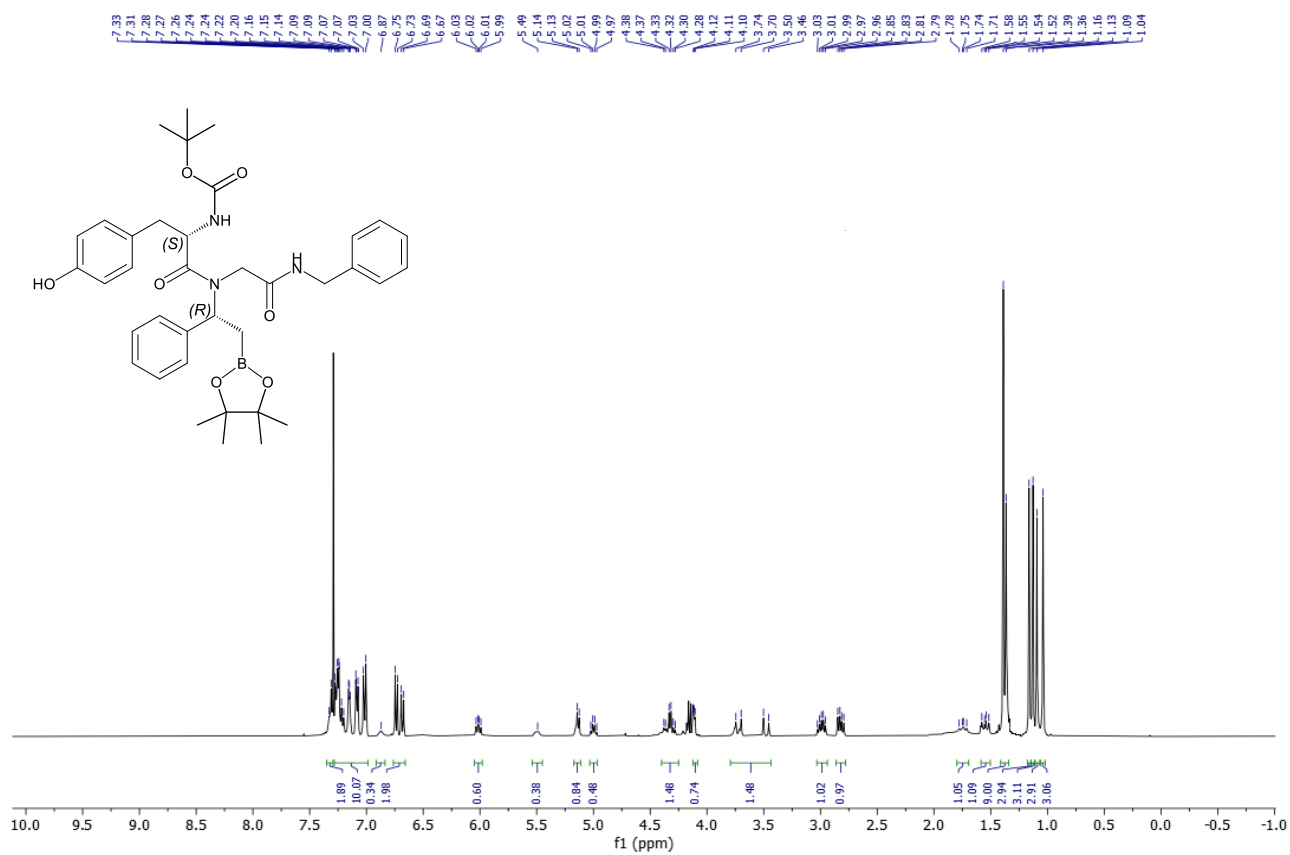

$^{13}\text{C}$  NMR of compound **2h** (101 MHz,  $\text{CDCl}_3$ , 50:50 rotameric mixture)

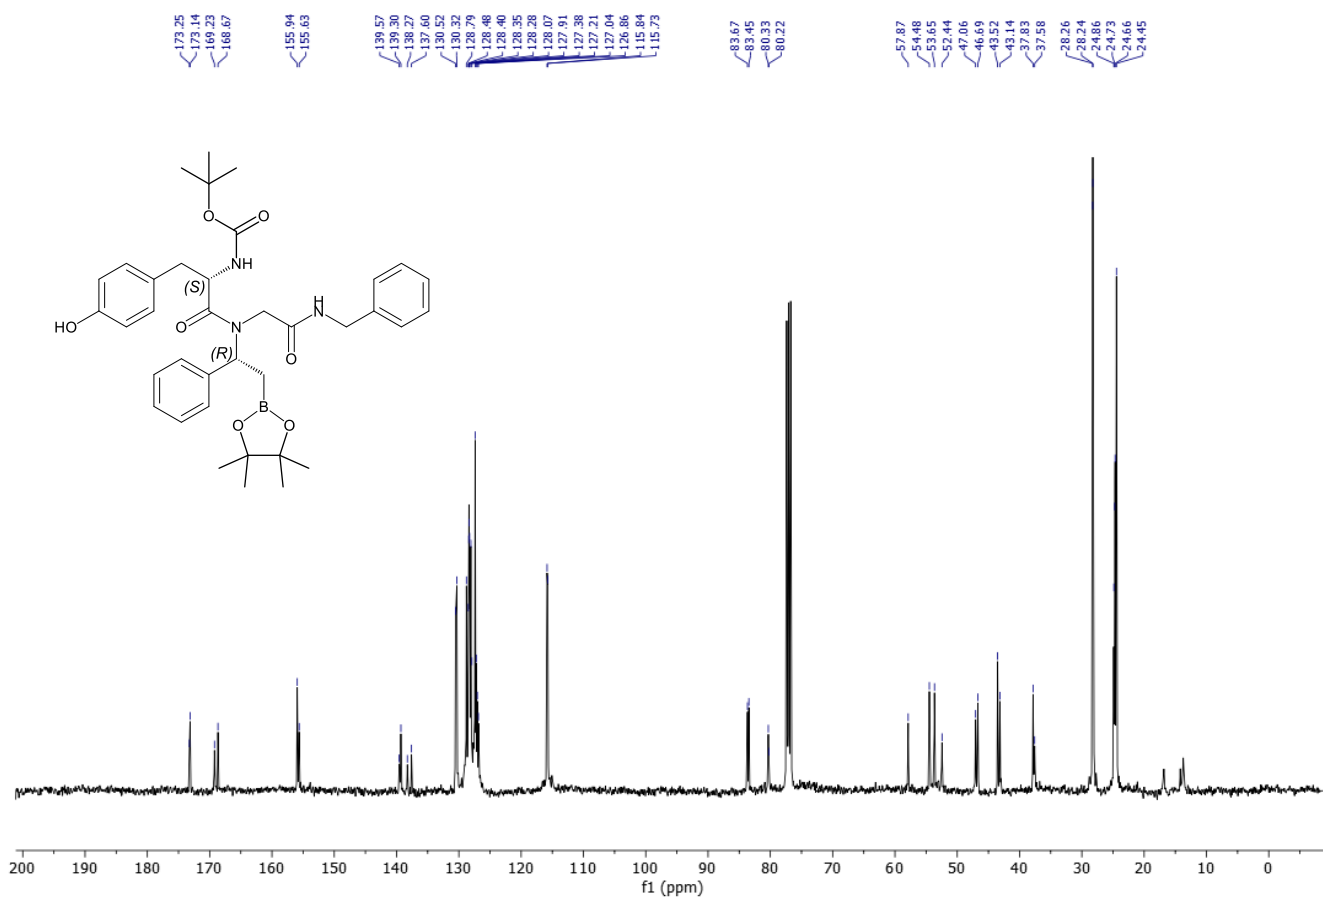

<sup>11</sup>B NMR of compound **2h** (128 MHz, CDCl<sub>3</sub>)

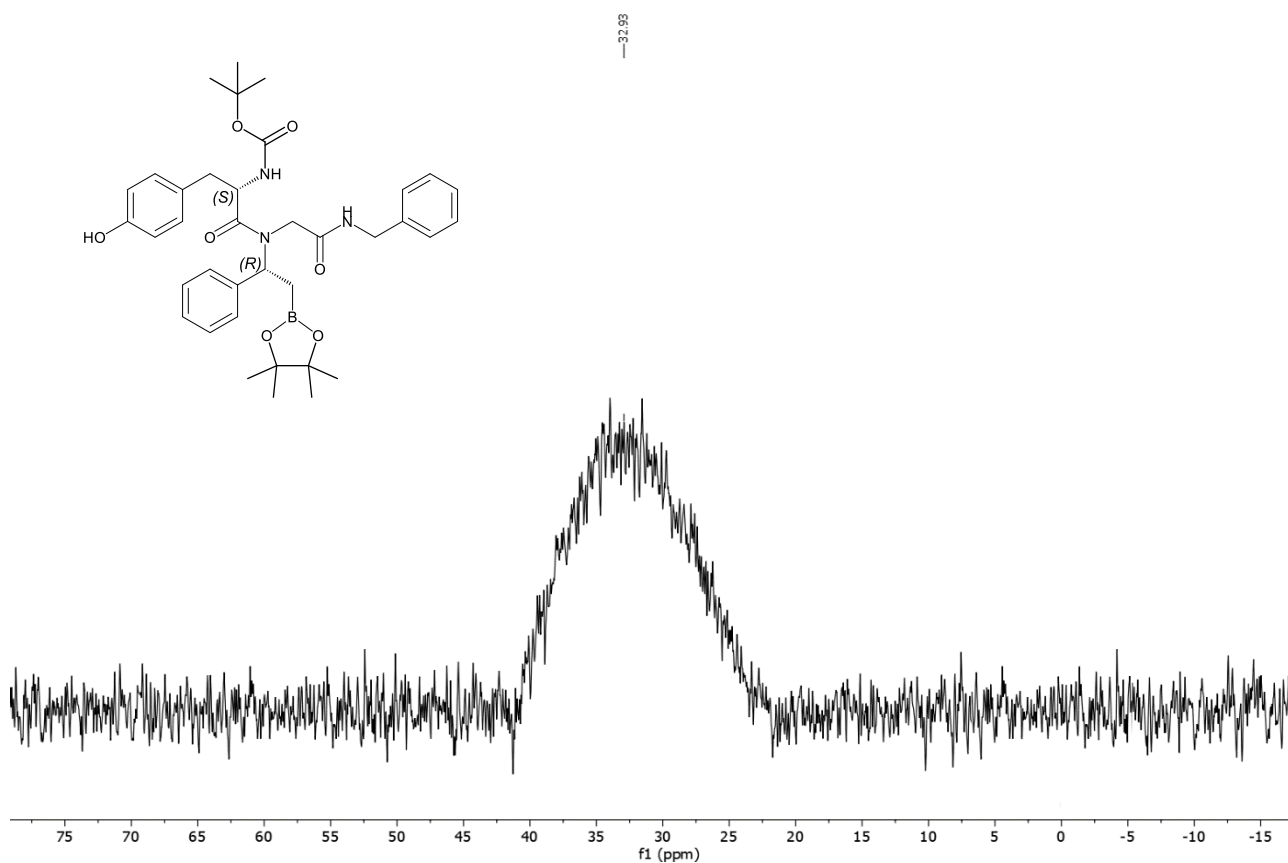

<sup>1</sup>H NMR of compound **3a** (400 MHz, CD<sub>3</sub>CN + 1 drop of H<sub>2</sub>O, 60:40 rotameric mixture)

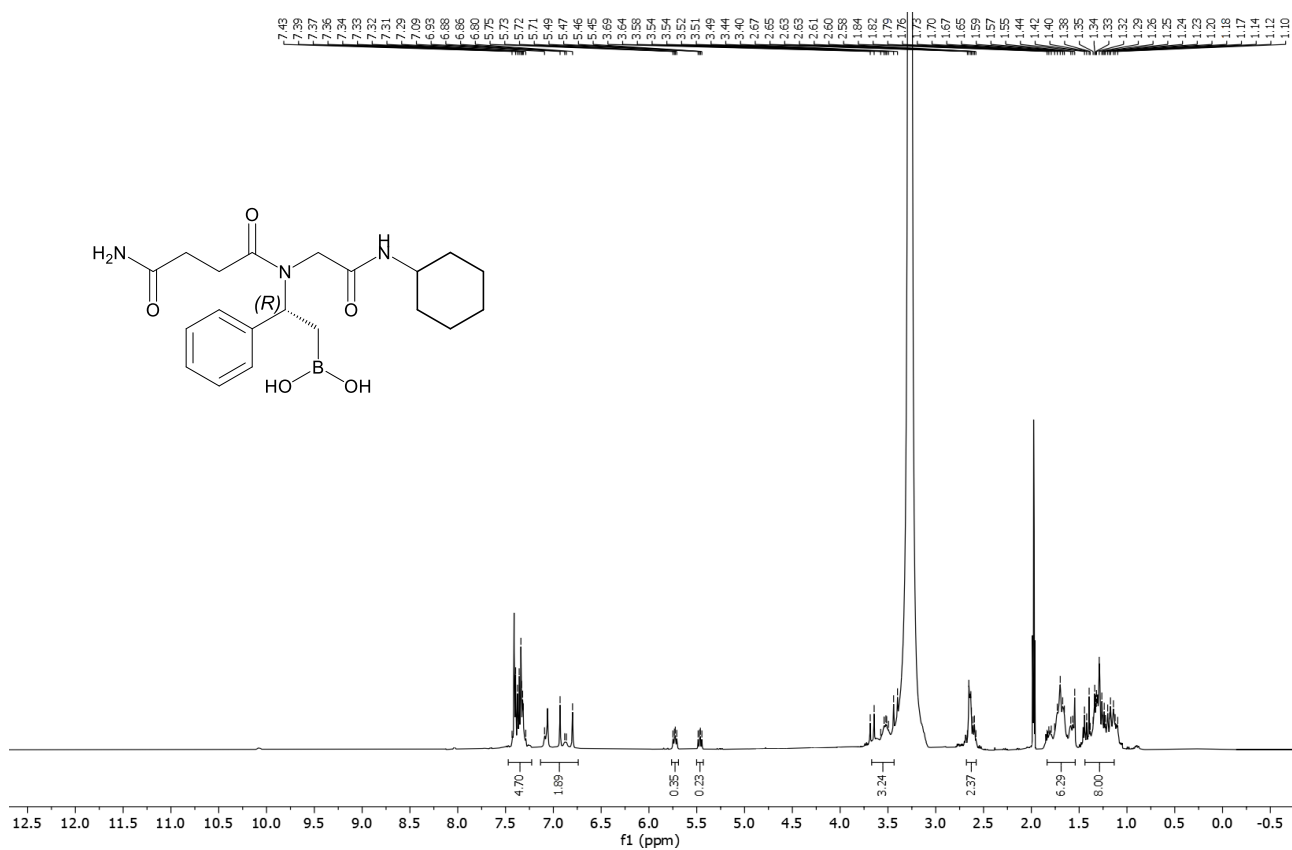

<sup>13</sup>C NMR of compound **3a** (101 MHz, CD<sub>3</sub>CN + 1 drop of H<sub>2</sub>O, 60:40 rotameric mixture)

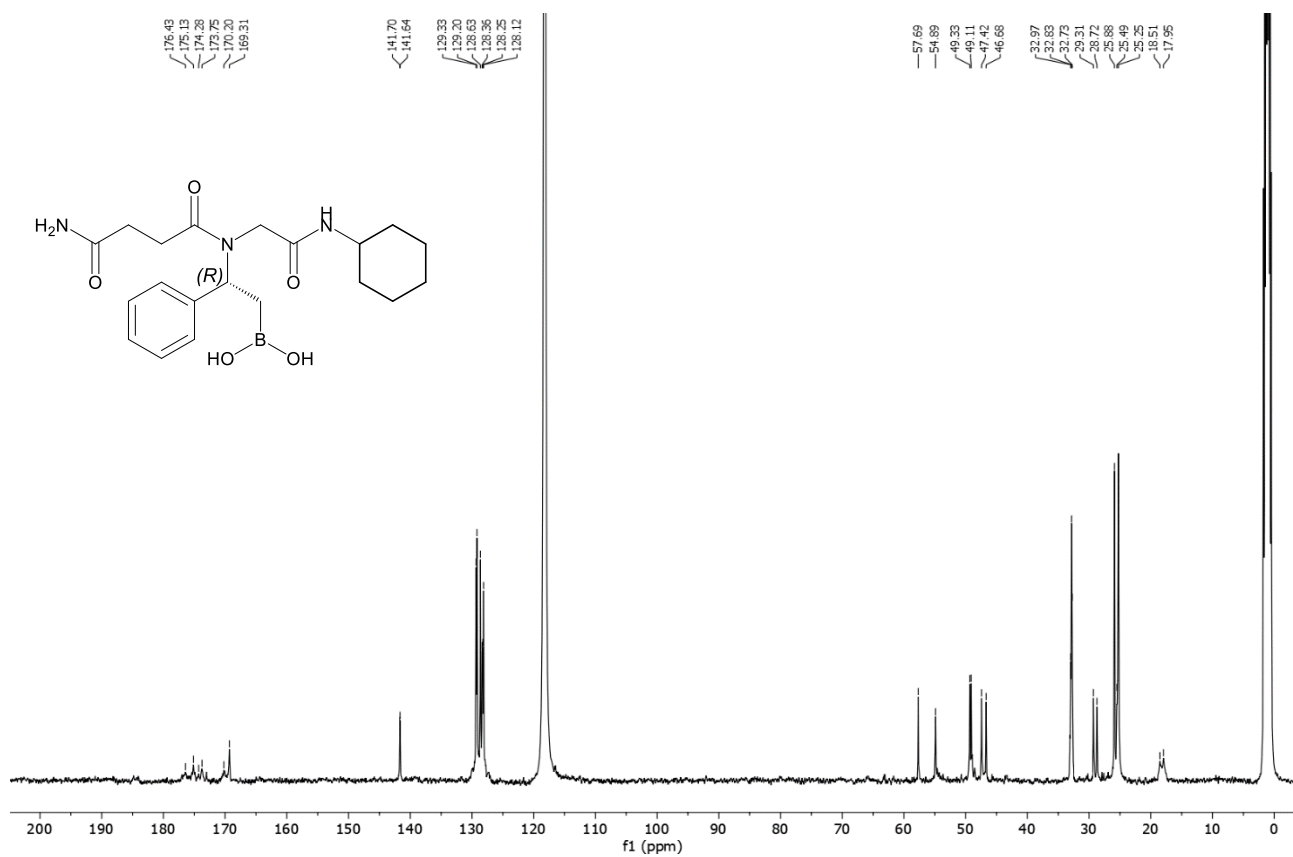

<sup>11</sup>B NMR of compound **3a** (128 MHz, CD<sub>3</sub>CN + 1 drop of H<sub>2</sub>O)

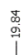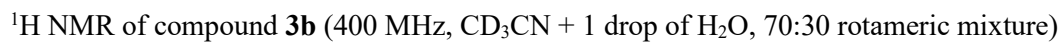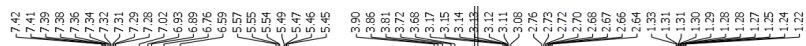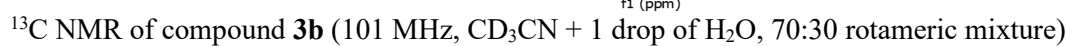



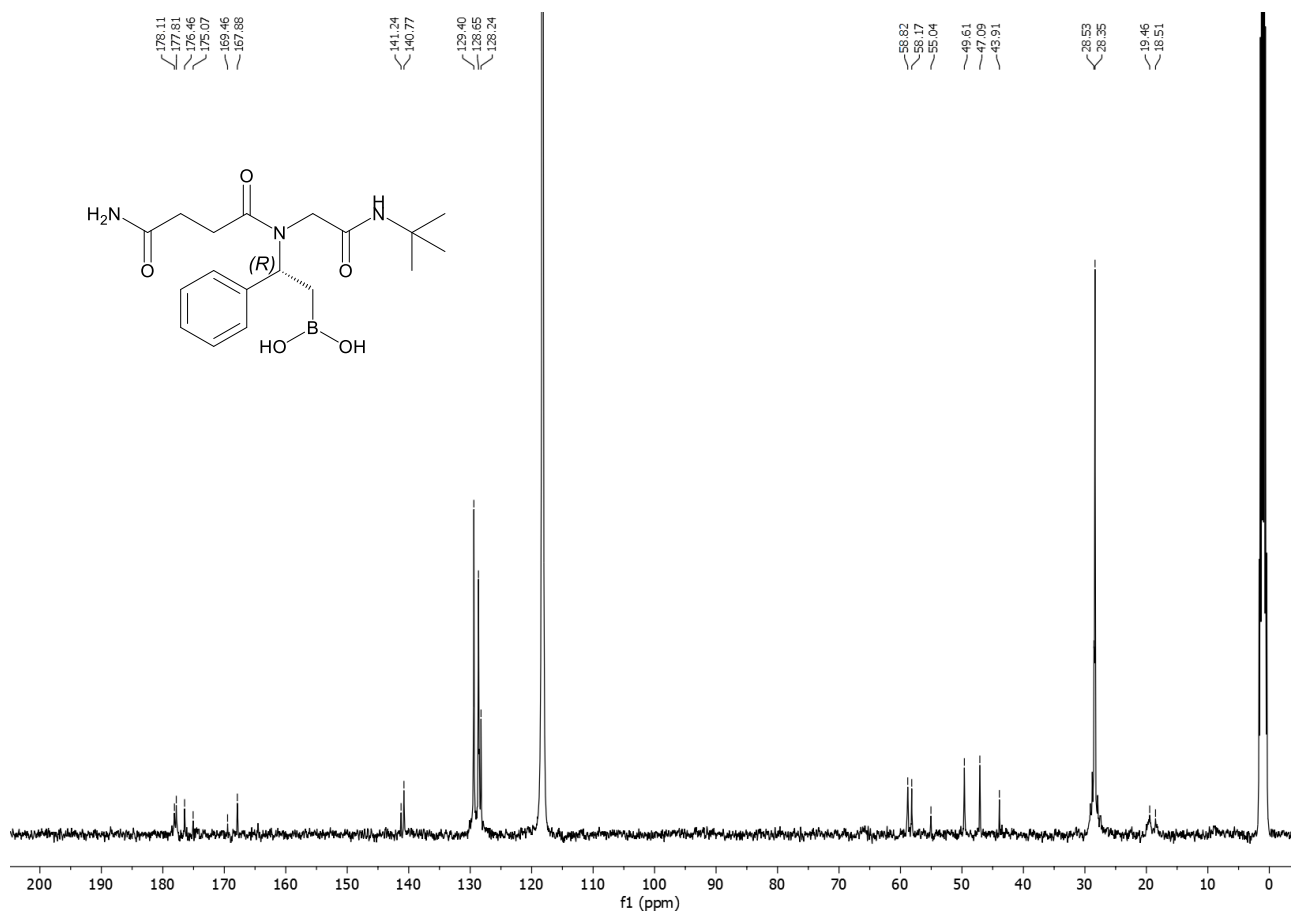

<sup>11</sup>B NMR of compound **3b** (128 MHz, CD<sub>3</sub>CN + 1 drop of H<sub>2</sub>O)

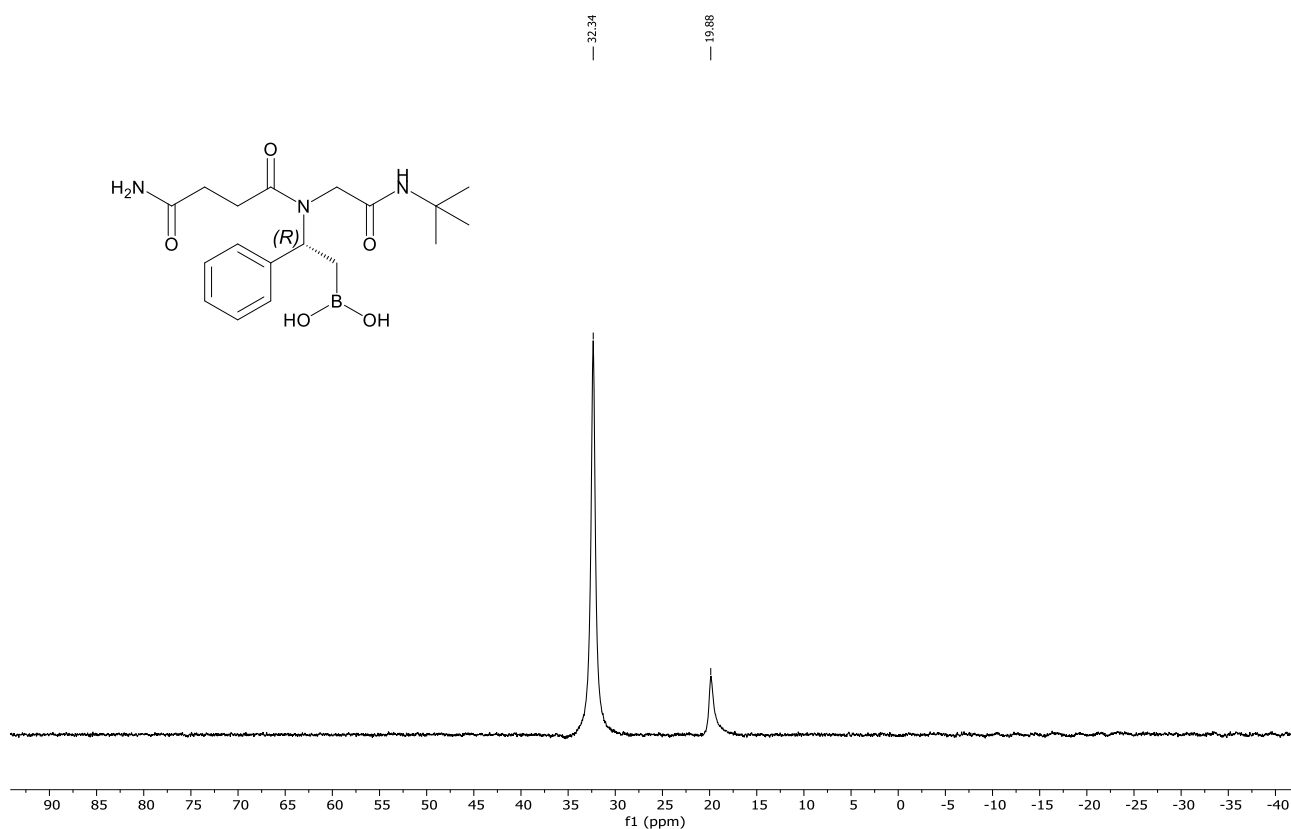

<sup>1</sup>H NMR of compound **3c** (400 MHz, CD<sub>3</sub>CN + 1 drop of H<sub>2</sub>O, 55:45 rotameric mixture)

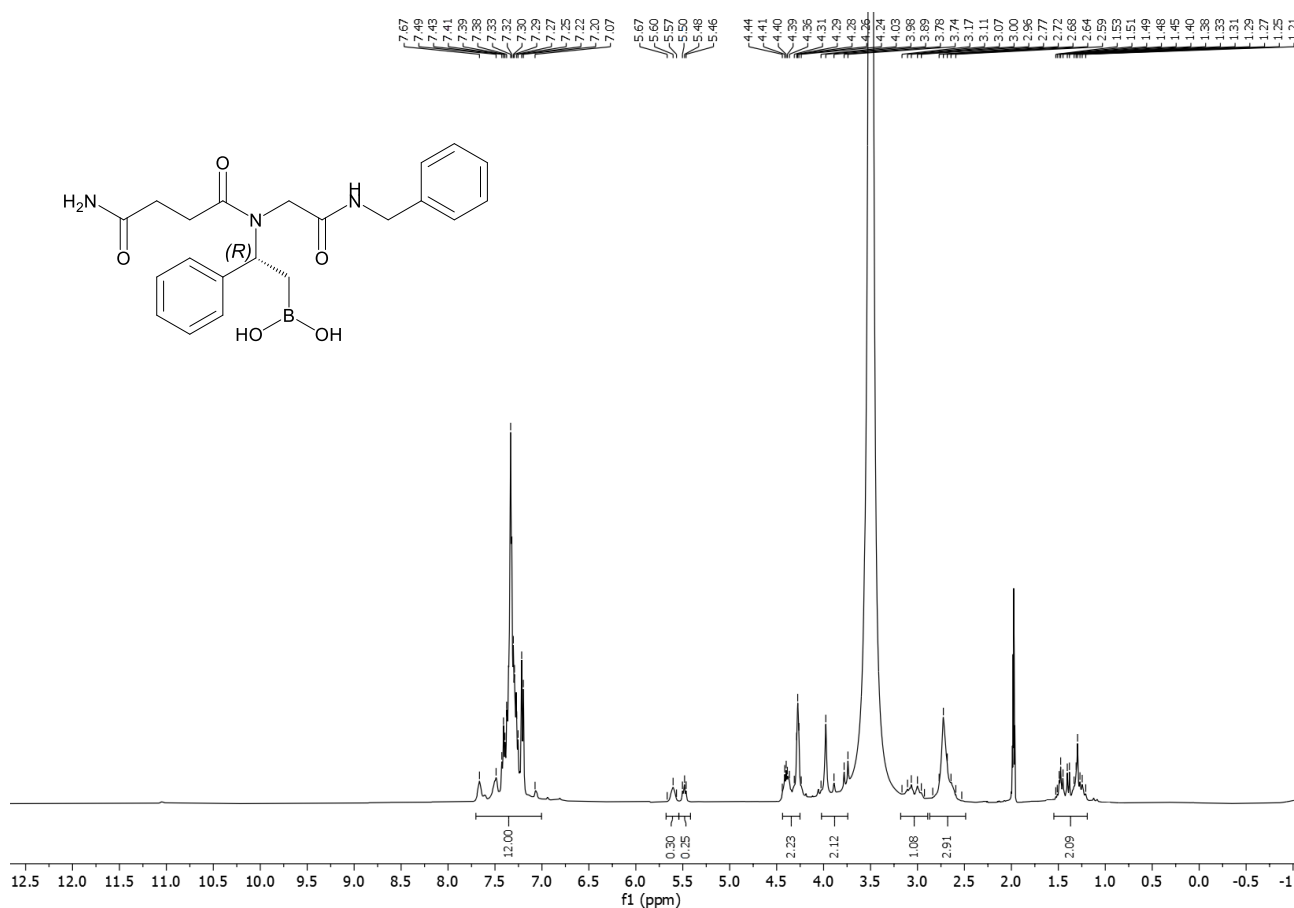

**<sup>13</sup>C NMR of compound 3c** (101 MHz, CD<sub>3</sub>CN + 1 drop of H<sub>2</sub>O, 55:45 rotameric mixture)

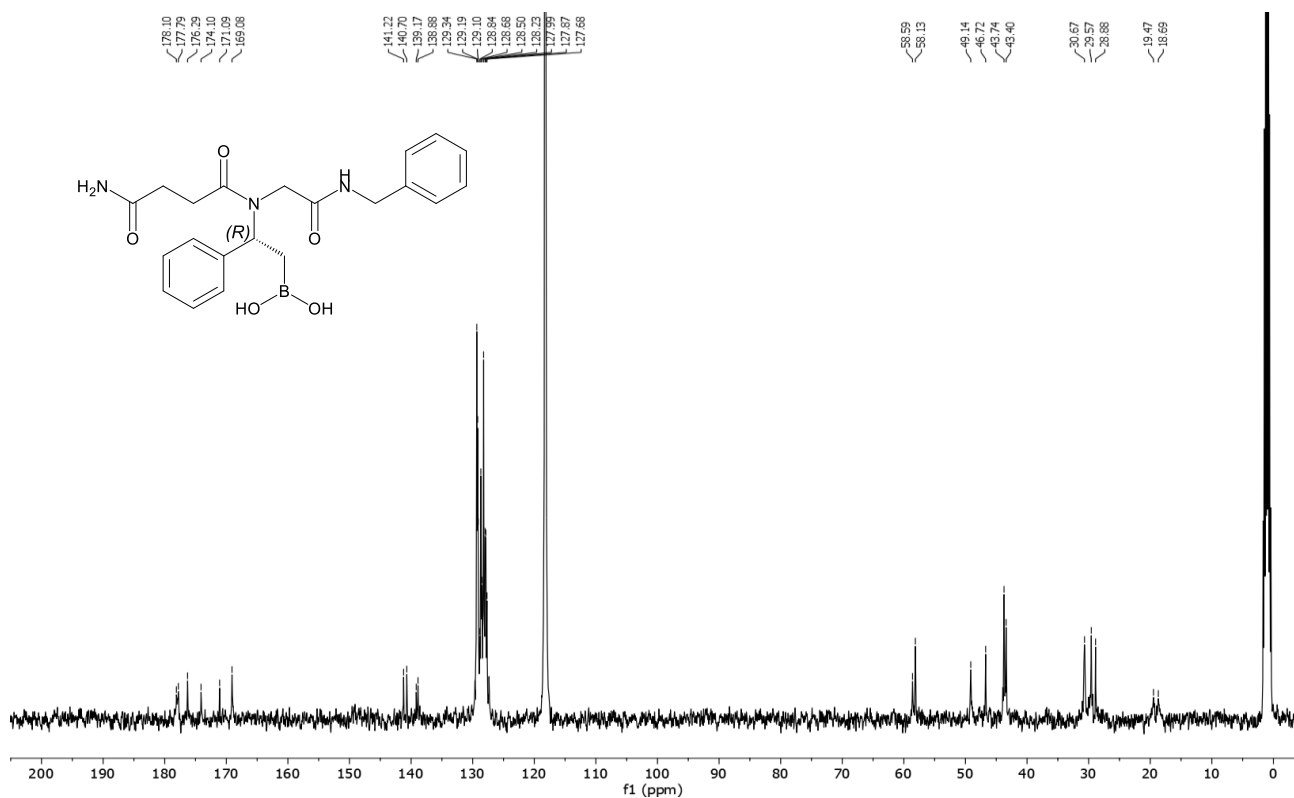

**<sup>11</sup>B NMR of compound 3c** (128 MHz, CD<sub>3</sub>CN + 1 drop of H<sub>2</sub>O)

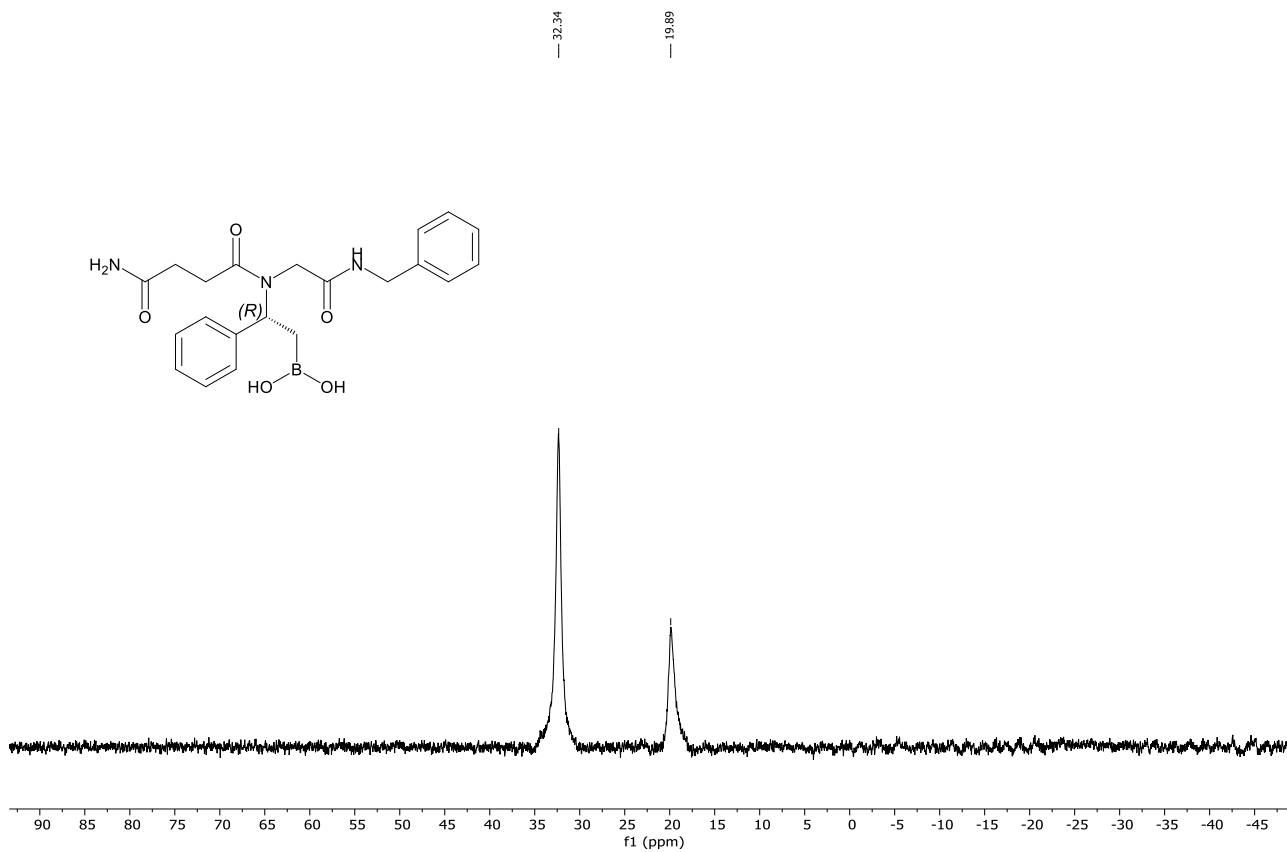

$^1\text{H}$  NMR of compound **3d** (400 MHz,  $\text{CDCl}_3$ , complex rotameric mixture: the section by section integration proves the overall number of protons)

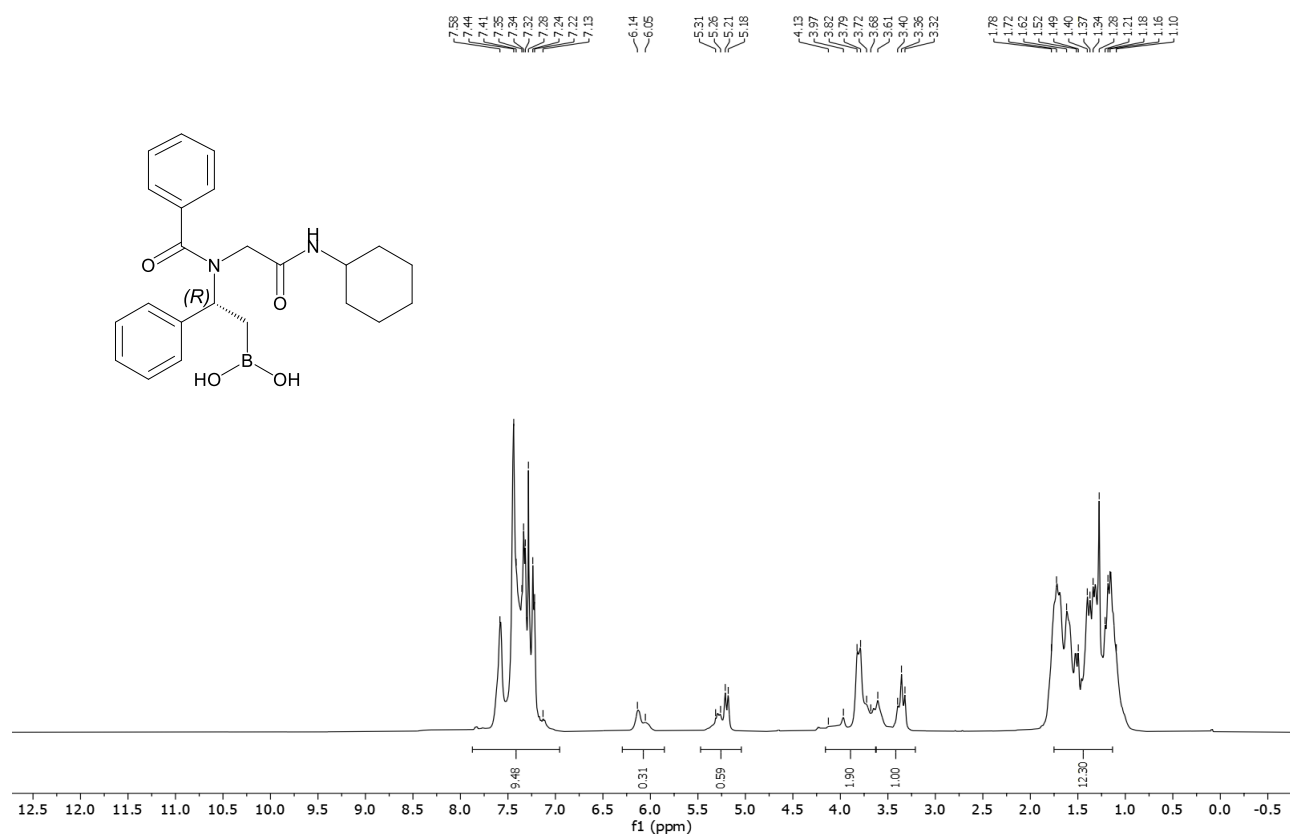

$^{13}\text{C}$  NMR of compound **3d** (101 MHz,  $\text{CDCl}_3$ , complex rotameric mixture)

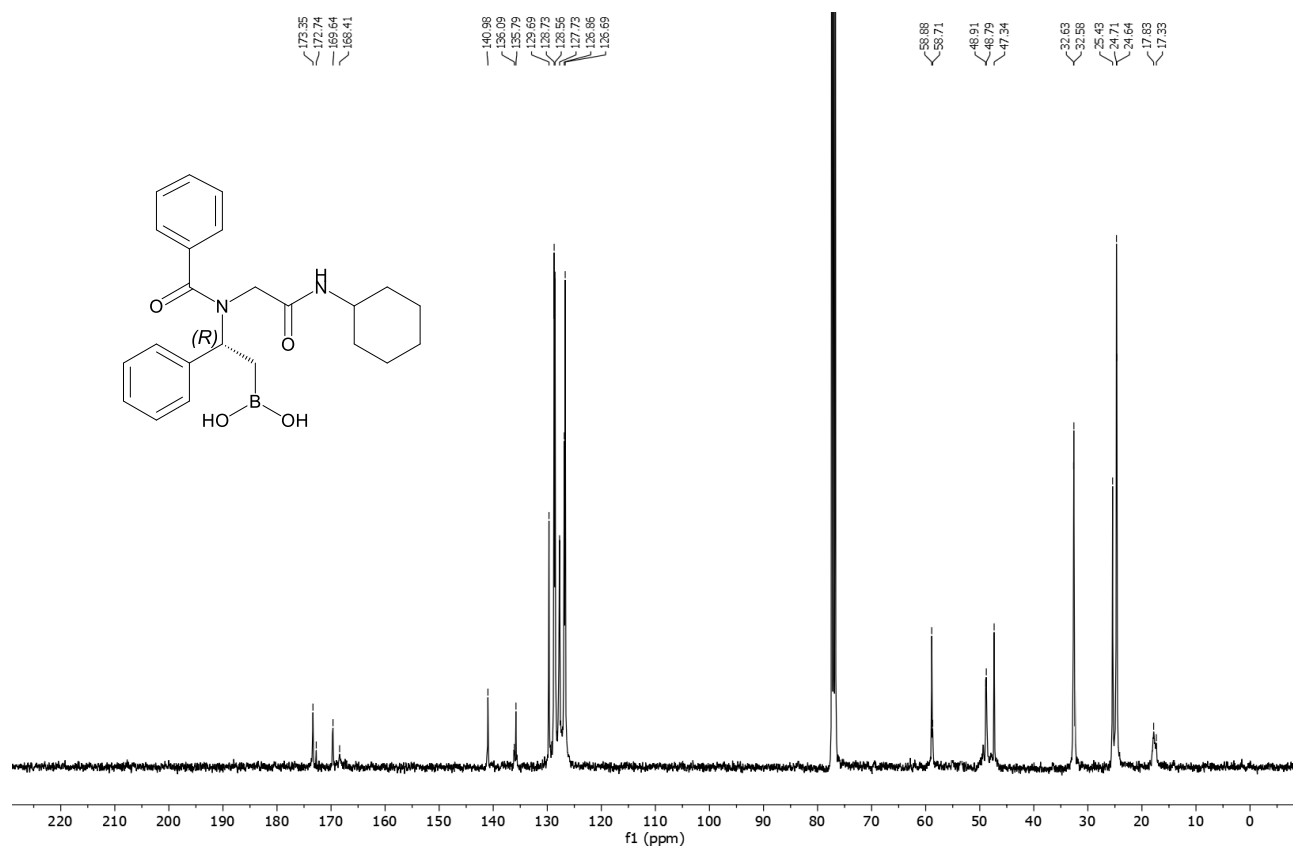

<sup>11</sup>B NMR of compound **3d** (128 MHz, CDCl<sub>3</sub>)

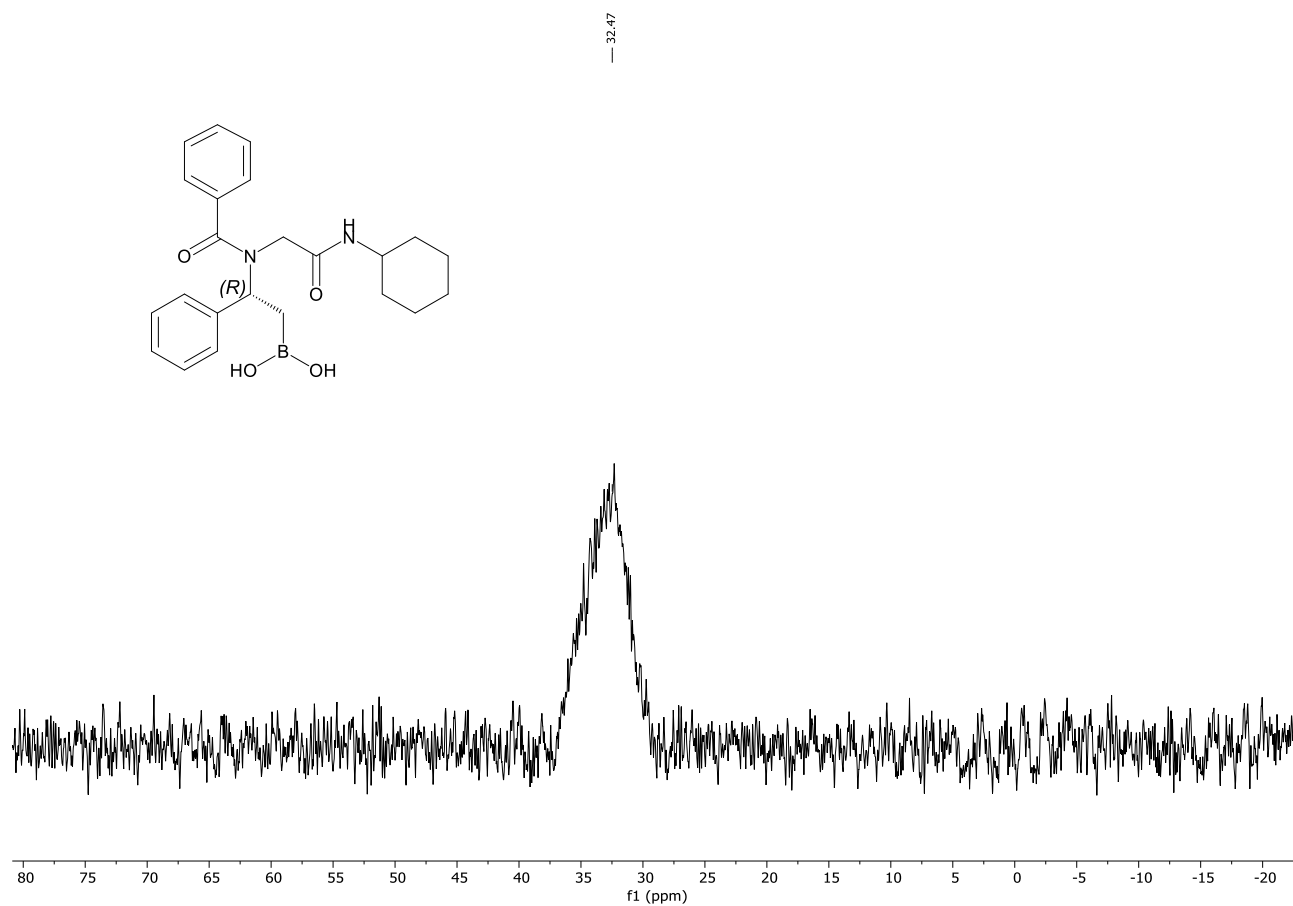

<sup>1</sup>H NMR of compound **3ea** (400 MHz, CD<sub>3</sub>CN + 1 drop of H<sub>2</sub>O, 55:45 rotameric mixture)

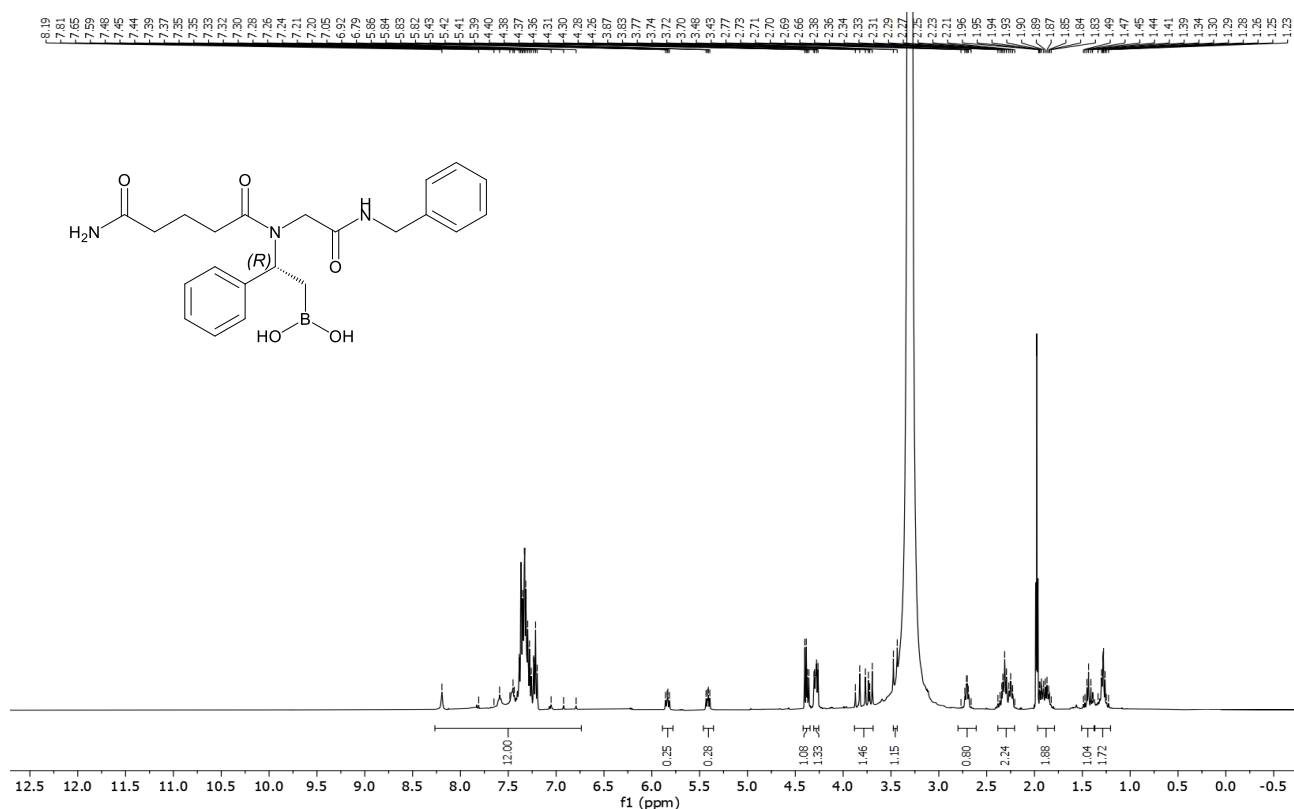

**<sup>13</sup>C NMR of compound **3ea** (101 MHz, CD<sub>3</sub>CN + 1 drop of H<sub>2</sub>O, 55:45 rotameric mixture)**

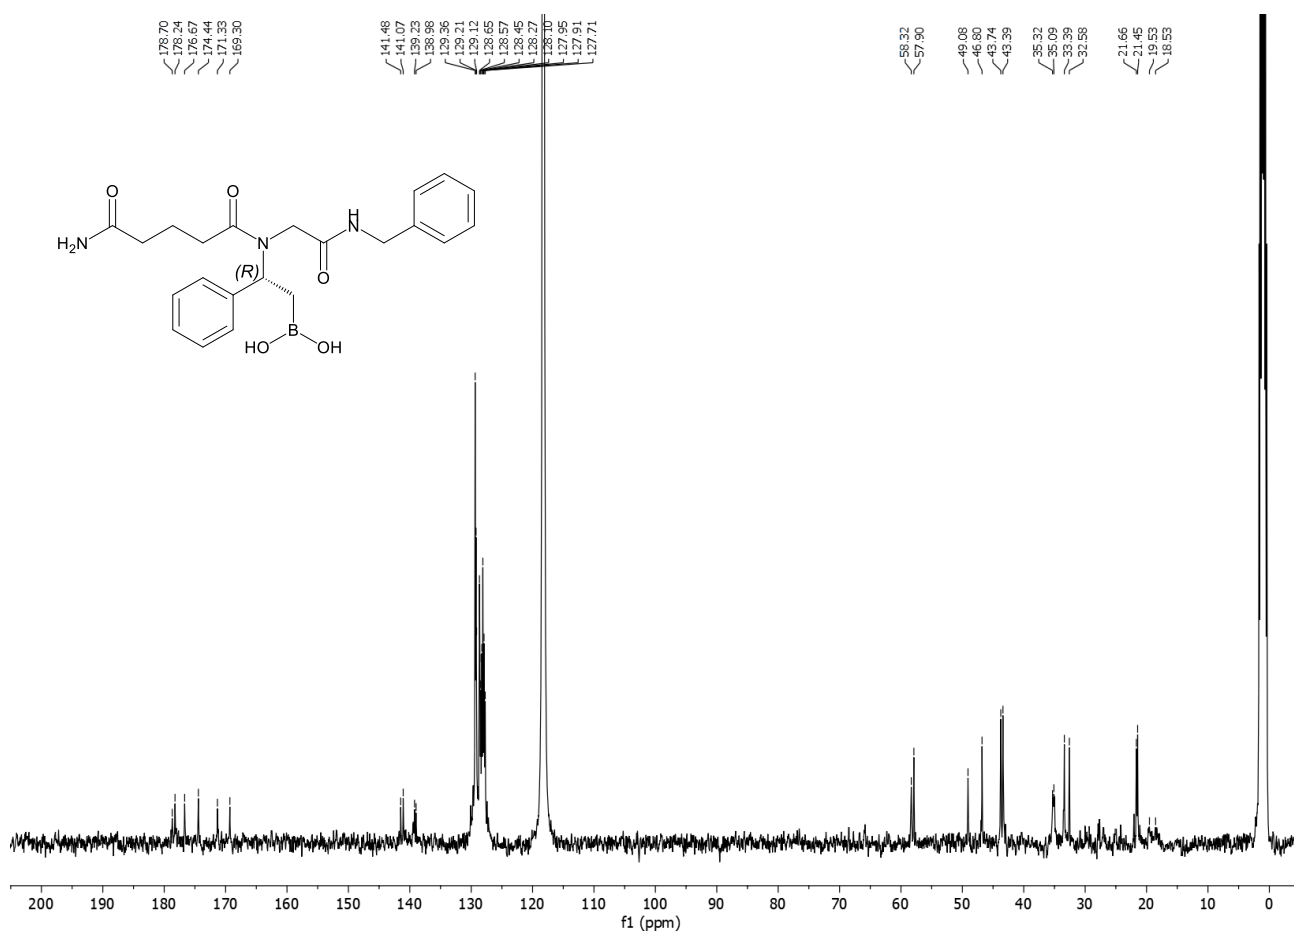

**<sup>11</sup>B NMR of compound **3ea** (128 MHz, CD<sub>3</sub>CN + 1 drop of H<sub>2</sub>O)**

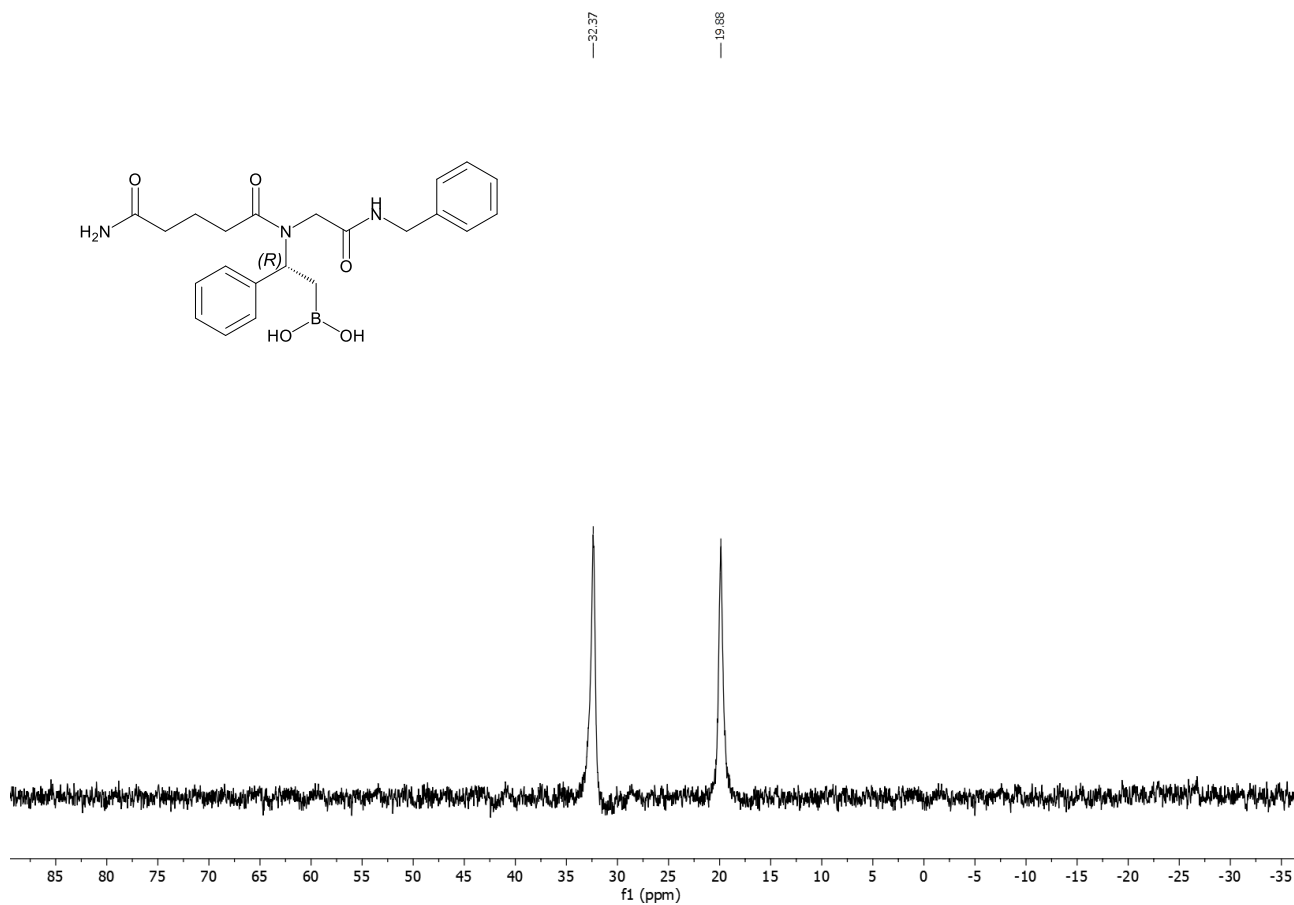

$^1\text{H}$  NMR of compound **3f** (400 MHz,  $\text{CD}_3\text{CN}$  + 1 drop of  $\text{H}_2\text{O}$ , 65:35 rotameric mixture)

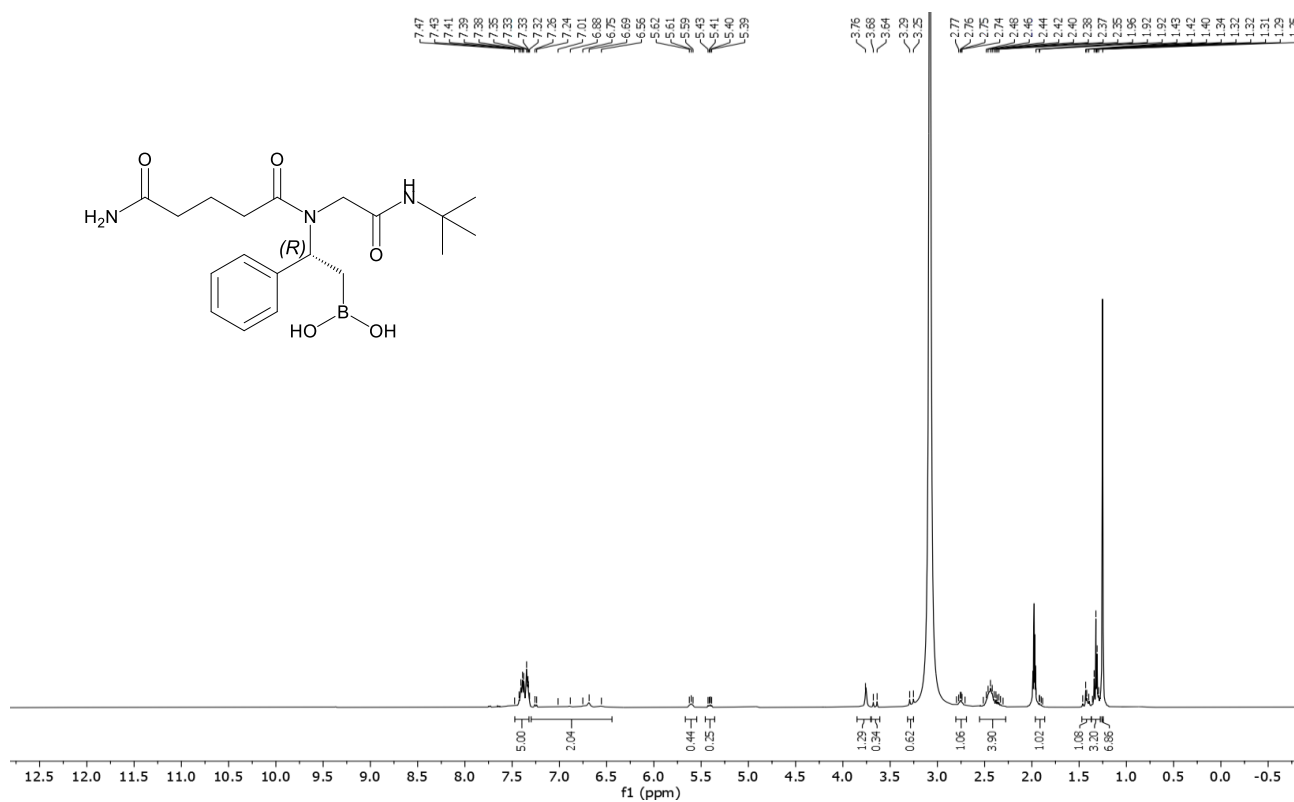

$^{13}\text{C}$  NMR of compound **3f** (101 MHz,  $\text{CD}_3\text{CN}$  + 1 drop of  $\text{H}_2\text{O}$ , 65:35 rotameric mixture)

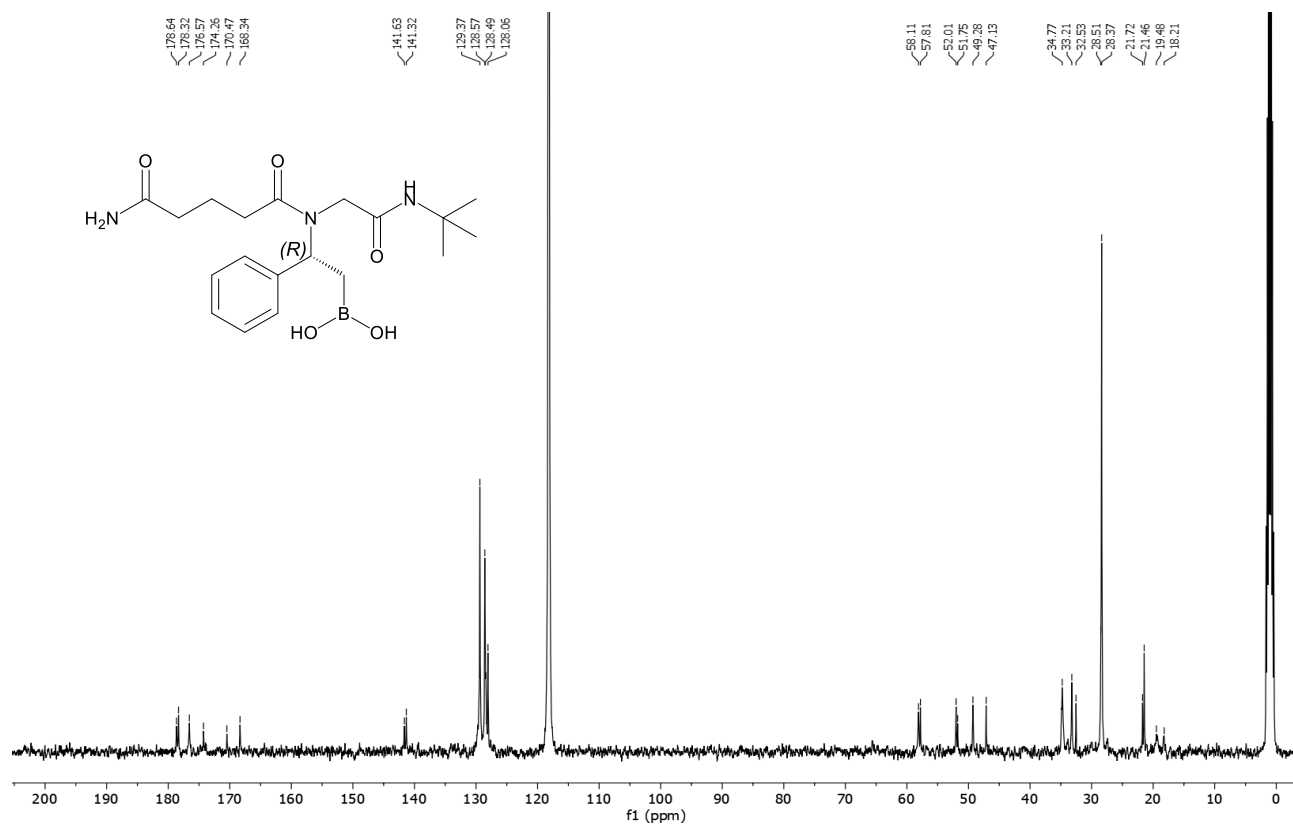

$^{11}\text{B}$  NMR of compound **3f** (128 MHz,  $\text{CD}_3\text{CN}$  + 1 drop of  $\text{H}_2\text{O}$ )

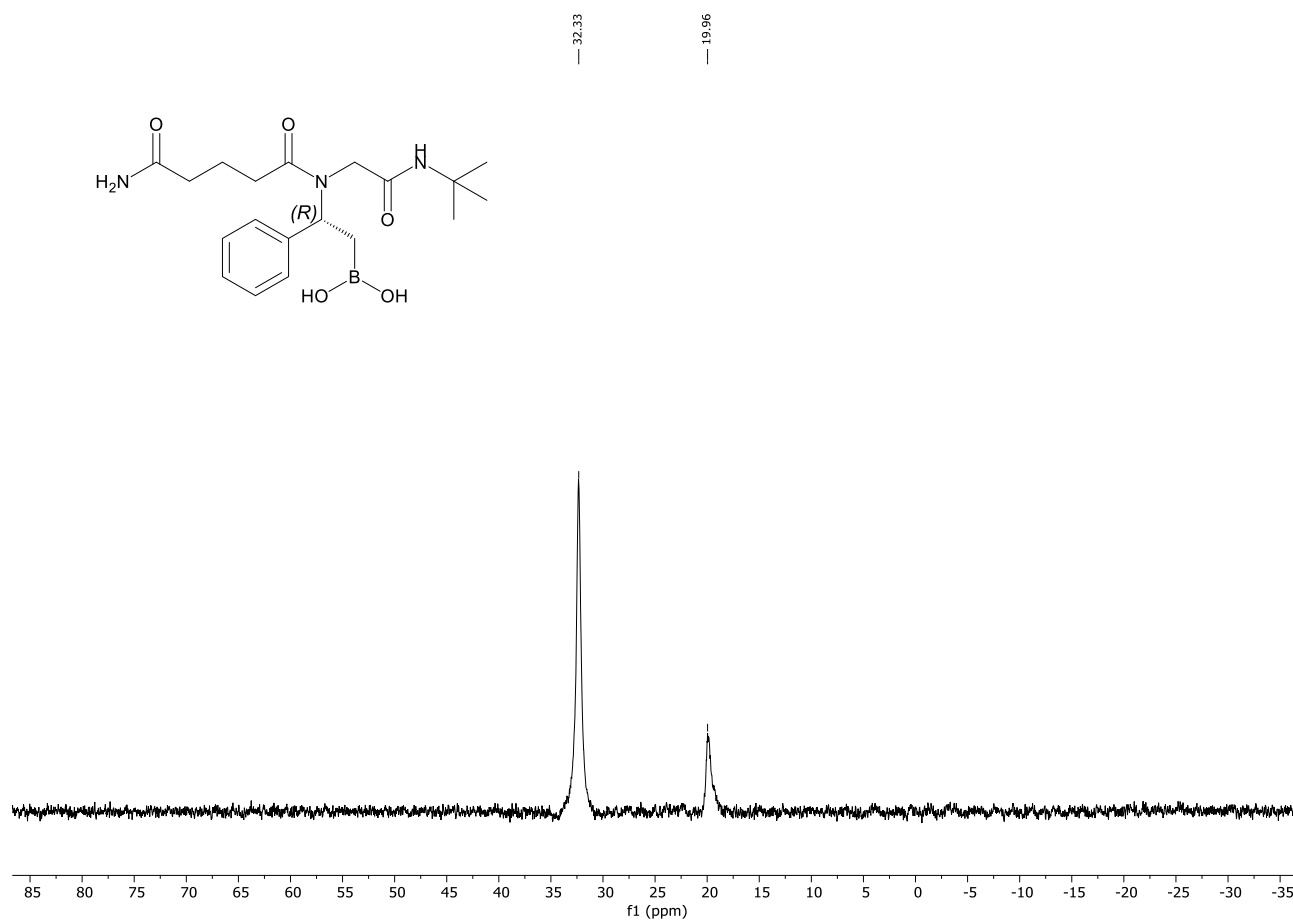

$^1\text{H}$  NMR of compound **3g** (400 MHz,  $\text{CD}_3\text{CN}$  + 1 drop of  $\text{H}_2\text{O}$ , 60:40 rotameric mixture)

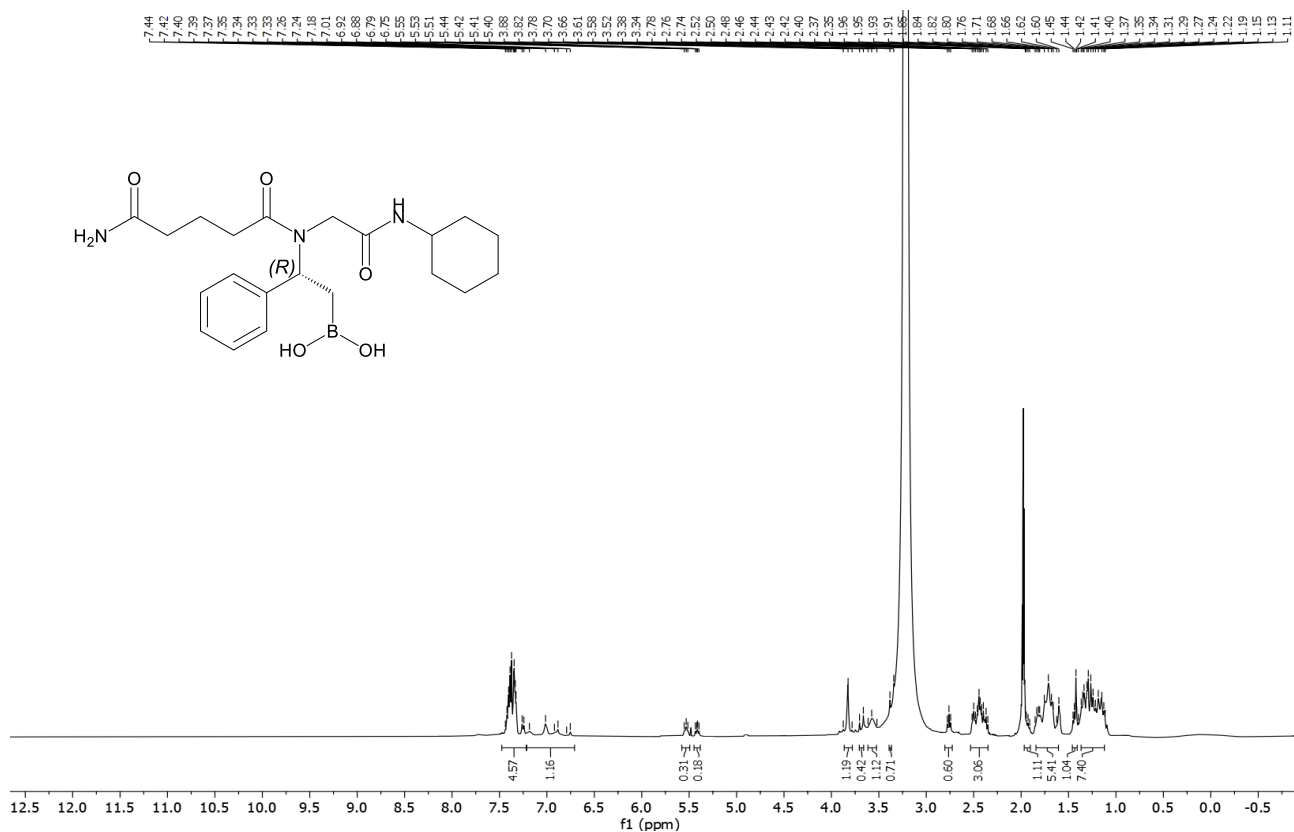

**<sup>13</sup>C NMR of compound 3g** (101 MHz, CD<sub>3</sub>CN + 1 drop of H<sub>2</sub>O, 60:40 rotameric mixture)

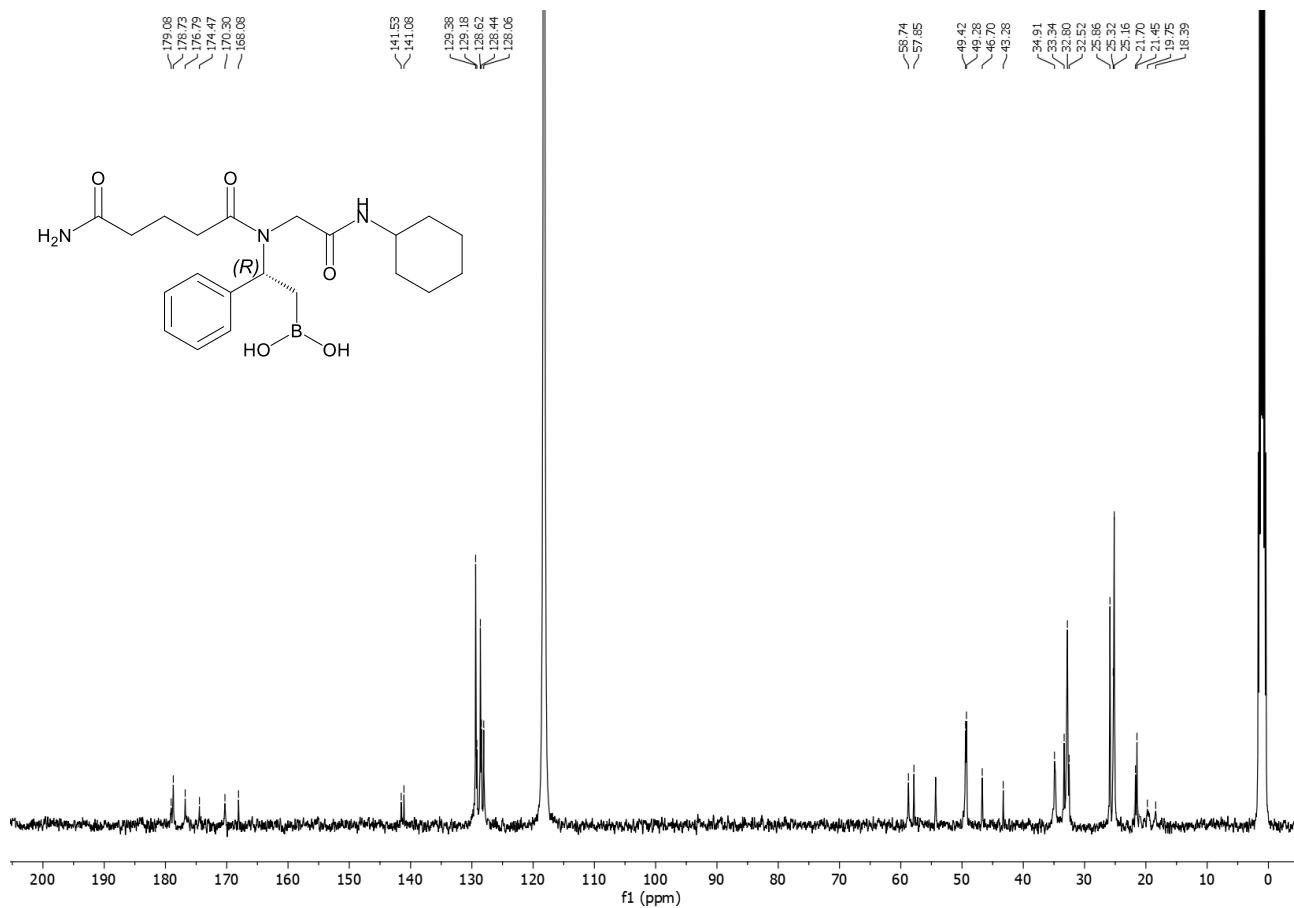

**<sup>11</sup>B NMR of compound 3g** (128 MHz, CD<sub>3</sub>CN + 1 drop of H<sub>2</sub>O)



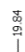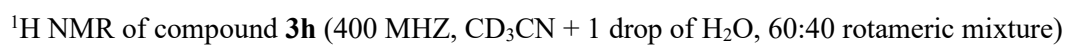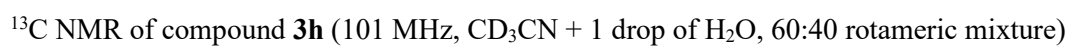

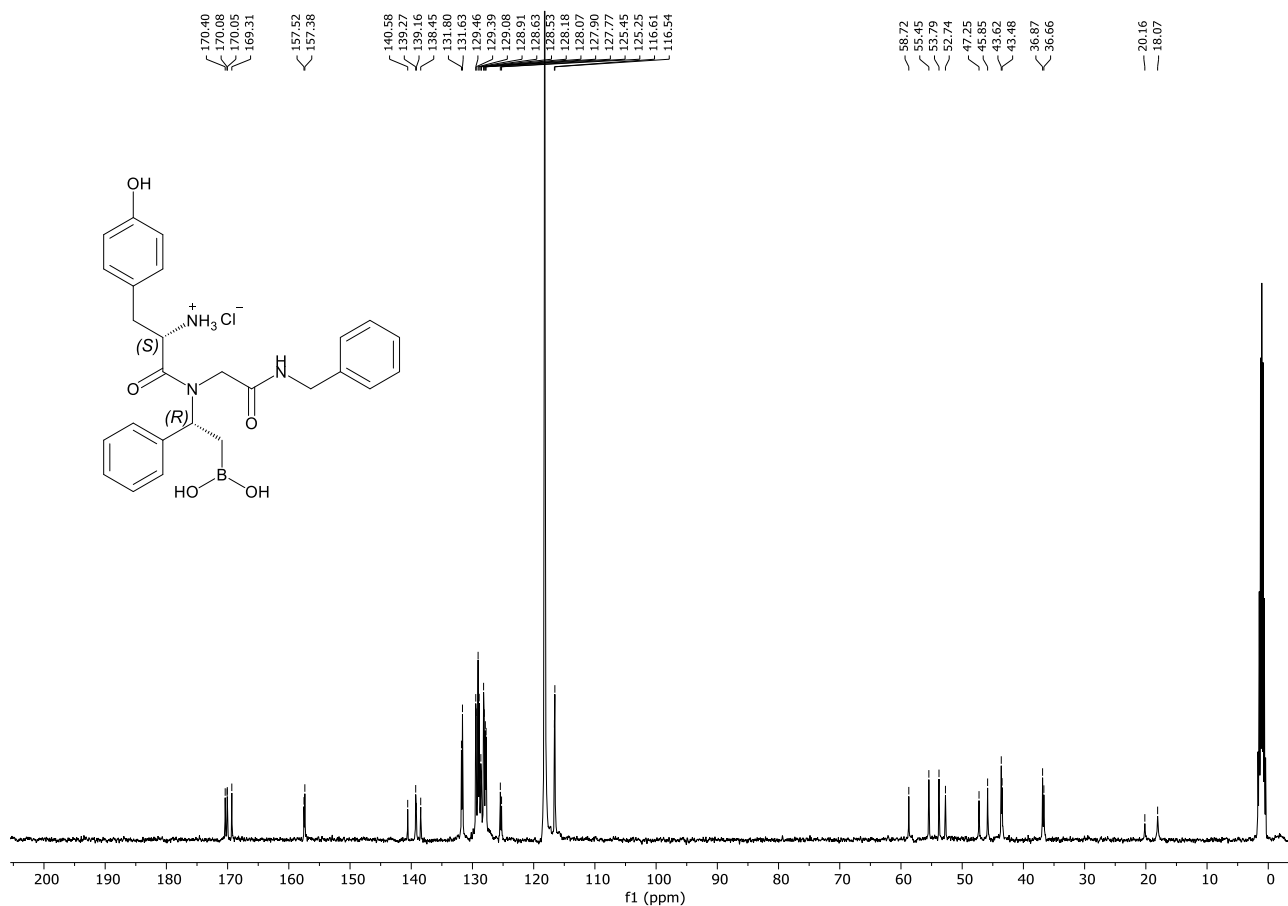

$^{11}\text{B}$  NMR of compound **3h** (128 MHz,  $\text{CD}_3\text{CN}$  + 1 drop of  $\text{H}_2\text{O}$ )

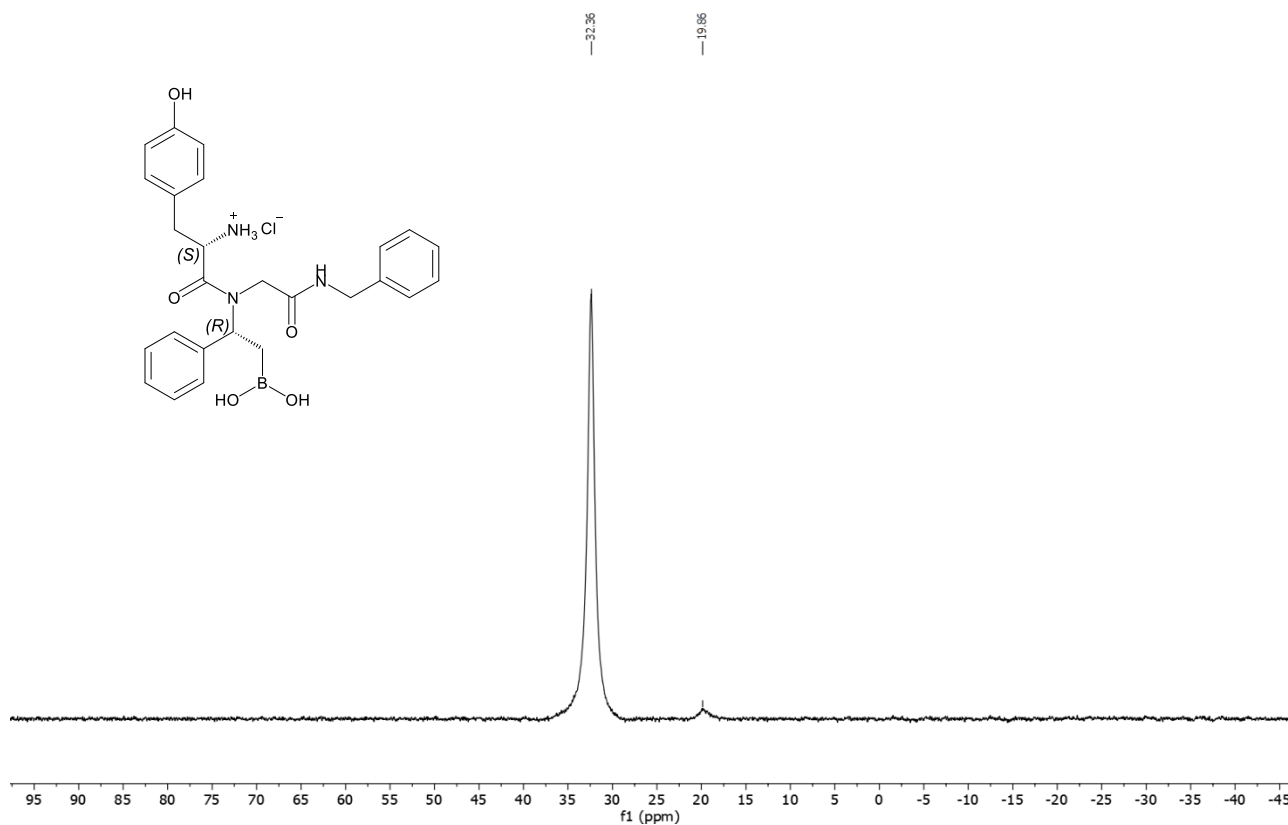

Supplement: s1 [file s1]
